# Supplementary material for: Diversity of Mycoviruses Present in Strains of Binucleate Rhizoctonia and Multinucleate Rhizoctonia, Causal Agents for Potato Stem Canker or Black Scurf
Source: MDPI journal article supplement (doi:10.3390/jof9020214), 2023-02-06
Supplement: s1 [file s1]

**Table S1.** Information of strains of binucleate *Rhizoctonia* (BNR) and multinucleate *Rhizoctonia* (MNR) isolated from diseased potatoes with symptoms of stem canker or black scurf.

| Strain code | Anastomosis group or subgroup | Karyotype     | Sampling site                              | Origin       |
|-------------|-------------------------------|---------------|--------------------------------------------|--------------|
| GS-27       | AG-3 PT                       | Multinucleate | Lanzhou city, Gansu province               | Reference 27 |
| GS-23       | AG-3 PT                       | Multinucleate | Linxia city, Gansu province                | Reference 27 |
| GS-1-1      | AG-3 PT                       | Multinucleate | Wuwei city, Gansu province                 | Reference 27 |
| GS-2        | AG-3 PT                       | Multinucleate | Wuwei city, Gansu province                 | Reference 27 |
| GS-1-2      | AG-K                          | Binucleate    | Wuwei city, Gansu province                 | Reference 36 |
| GS-6H       | AG-5                          | Multinucleate | Lanzhou city, Gansu province               | Reference 27 |
| GS-9        | AG-5                          | Multinucleate | Dingxi city, Gansu province                | Reference 27 |
| GS-19       | AG-K                          | Binucleate    | Linxia city, Gansu province                | Reference 36 |
| GS-6        | AG-K                          | Binucleate    | Lanzhou city, Gansu province               | Reference 36 |
| GS-11       | AG-K                          | Binucleate    | Dingxi city, Gansu province                | Reference 36 |
| GS-13-1     | AG-5                          | Multinucleate | Dingxi city, Gansu province                | Reference 27 |
| GS-8        | AG-5                          | Multinucleate | Dingxi city, Gansu province                | Reference 27 |
| GS-24       | AG-4HGII                      | Multinucleate | Baiyin city, Gansu province                | Reference 27 |
| GS-25       | AG-4HGII                      | Multinucleate | Baiyin city, Gansu province                | Reference 23 |
| GS-4        | AG-5                          | Multinucleate | Lanzhou city, Gansu province               | Reference 27 |
| GS-20       | AG-5                          | Multinucleate | Linxia city, Gansu province                | Reference 27 |
| GS-28       | AG-3 PT                       | Multinucleate | Dingxi city, Gansu province                | Reference 27 |
| GS-34       | AG-3 PT                       | Multinucleate | Zhangye city, Gansu province               | Reference 27 |
| GS-38       | AG-A                          | Binucleate    | Zhangye city, Gansu province               | Reference 36 |
| GS-30H      | AG-3 PT                       | Multinucleate | Wuwei city, Gansu province                 | Reference 27 |
| GS-12       | AG-3 PT                       | Multinucleate | Dingxi city, Gansu province                | Reference 27 |
| NX-11       | AG-5                          | Multinucleate | Guyuan city, Ningxia Hui autonomous region | Reference 27 |
| NX-2        | AG-3 PT                       | Multinucleate | Guyuan city, Ningxia Hui autonomous region | Reference 27 |

|          |          |               |                                             |              |
|----------|----------|---------------|---------------------------------------------|--------------|
| NX-5     | AG-3 PT  | Multinucleate | Guyuan city, Ningxia Hui autonomous region  | Reference 27 |
| NXSG-12X | AG-3 PT  | Multinucleate | Guyuan city, Ningxia Hui autonomous region  | This study   |
| NXSG-11X | AG-3 PT  | Multinucleate | Guyuan city, Ningxia Hui autonomous region  | This study   |
| NXSG-3X  | AG-3 PT  | Multinucleate | Guyuan city, Ningxia Hui autonomous region  | This study   |
| NXSG-4X  | AG-3 PT  | Multinucleate | Guyuan city, Ningxia Hui autonomous region  | This study   |
| NXSG-6X  | AG-3 PT  | Multinucleate | Guyuan city, Ningxia Hui autonomous region  | This study   |
| NXSG-8X  | AG-3 PT  | Multinucleate | Guyuan city, Ningxia Hui autonomous region  | This study   |
| NXSG-9X  | AG-3 PT  | Multinucleate | Guyuan city, Ningxia Hui autonomous region  | This study   |
| NXZB-1X  | AG-4HGII | Multinucleate | Guyuan city, Ningxia Hui autonomous region  | This study   |
| NXZB-3X  | AG-4HGII | Multinucleate | Guyuan city, Ningxia Hui autonomous region  | This study   |
| NXSG-5X  | AG-3 PT  | Multinucleate | Guyuan city, Ningxia Hui autonomous region  | This study   |
| NXZB-2X  | AG-5     | Multinucleate | Guyuan city, Ningxia Hui autonomous region  | This study   |
| NXSG-2X  | AG-3 PT  | Multinucleate | Guyuan city, Ningxia Hui autonomous region  | This study   |
| NXSG-1X  | AG-3 PT  | Multinucleate | Guyuan city, Ningxia Hui autonomous region  | This study   |
| NWYS-1   | AG-3 PT  | Multinucleate | Wuzhong city, Ningxia Hui autonomous region | This study   |
| NXSG-10X | AG-3 PT  | Multinucleate | Guyuan city, Ningxia Hui autonomous region  | This study   |
| NWYS-2   | AG-3 PT  | Multinucleate | Wuzhong city, Ningxia Hui autonomous region | This study   |
| NWYS-6   | AG-3 PT  | Multinucleate | Wuzhong city, Ningxia Hui autonomous region | This study   |
| NWYS-4   | AG-3 PT  | Multinucleate | Wuzhong city, Ningxia Hui autonomous region | This study   |
| HeB-13-1 | AG-3 PT  | Multinucleate | Chengde city, Hebei province                | Reference 27 |
| HBZJ-4X  | AG-5     | Multinucleate | Zhangjiakou city, Hebei province            | This study   |
| HBZJ-5X  | AG-3 PT  | Multinucleate | Zhangjiakou city, Hebei province            | This study   |
| HBZJ-2X  | AG-4HGII | Multinucleate | Zhangjiakou city, Hebei province            | This study   |
| HeB-17   | AG-5     | Multinucleate | Tangshan city, Hebei province               | Reference 27 |
| HeB-18   | AG-5     | Multinucleate | Qinhuangdao city, Hebei province            | Reference 27 |
| HeB-20   | AG-4HGII | Multinucleate | Zhangjiakou city, Hebei province            | Reference 27 |

|         |          |               |                                  |              |
|---------|----------|---------------|----------------------------------|--------------|
| HBZJ-3X | AG-4HGII | Multinucleate | Zhangjiakou city, Hebei province | This study   |
| HBZJ-1X | AG-4HGI  | Multinucleate | Zhangjiakou city, Hebei province | This study   |
| YN-17H  | AG-3 PT  | Multinucleate | Kunming city, Yunnan province    | Reference 27 |
| YNKY-2X | AG-A     | Binucleate    | Kaiyuan city, Yunnan province    | This study   |
| YNKY-4X | AG-A     | Binucleate    | Kaiyuan city, Yunnan province    | This study   |
| YNKY-1X | AG-A     | Binucleate    | Kaiyuan city, Yunnan province    | This study   |
| YNKY-5X | AG-A     | Binucleate    | Kaiyuan city, Yunnan province    | This study   |
| YNKY-3X | AG-A     | Binucleate    | Kaiyuan city, Yunnan province    | This study   |
| YN-5H   | AG-3 PT  | Multinucleate | Kunming city, Yunnan province    | Reference 27 |
| DDJJ-2  | AG-A     | Binucleate    | Datong city, Shanxi province     | This study   |
| DDJJ-1  | AG-A     | Binucleate    | Datong city, Shanxi province     | This study   |
| SHMM-7  | AG-A     | Binucleate    | Shuozhou city, Shanxi province   | This study   |
| DDJJ-3  | AG-A     | Binucleate    | Datong city, Shanxi province     | This study   |
| SHMM-1  | AG-A     | Binucleate    | Shuozhou city, Shanxi province   | This study   |
| YJLC-4  | AG-A     | Binucleate    | Yangquan city, Shanxi province   | This study   |
| XKGS-12 | AG-K     | Binucleate    | Xinzhou city, Shanxi province    | This study   |
| YJLC-2  | AG-A     | Binucleate    | Yangquan city, Shanxi province   | This study   |
| XKGS-10 | AG-K     | Binucleate    | Xinzhou city, Shanxi province    | This study   |
| XKGS-13 | AG-K     | Binucleate    | Xinzhou city, Shanxi province    | This study   |
| XKGS-9  | AG-K     | Binucleate    | Xinzhou city, Shanxi province    | This study   |
| JSZS-3  | AG-A     | Binucleate    | Jinzhong city, Shanxi province   | This study   |
| SHMM-5  | AG-K     | Binucleate    | Shuozhou city, Shanxi province   | This study   |
| YJLC-3  | AG-A     | Binucleate    | Yangquan city, Shanxi province   | This study   |
| XKGS-8  | AG-K     | Binucleate    | Xinzhou city, Shanxi province    | This study   |
| YJLC-1  | AG-A     | Binucleate    | Yangquan city, Shanxi province   | This study   |
| SHMM-2  | AG-A     | Binucleate    | Shuozhou city, Shanxi province   | This study   |

|         |         |               |                                |            |
|---------|---------|---------------|--------------------------------|------------|
| SHMM-3  | AG-A    | Binucleate    | Shuozhou city, Shanxi province | This study |
| SHMM-4  | AG-A    | Binucleate    | Shuozhou city, Shanxi province | This study |
| SHMM-6  | AG-A    | Binucleate    | Shuozhou city, Shanxi province | This study |
| XJDS-11 | AG-5    | Multinucleate | Xinzhou city, Shanxi province  | This study |
| LLSY-12 | AG-5    | Multinucleate | Lvliang city, Shanxi province  | This study |
| XKSA-8  | AG-3 PT | Multinucleate | Xinzhou city, Shanxi province  | This study |
| XJDM-2  | AG-3 PT | Multinucleate | Xinzhou city, Shanxi province  | This study |
| XKGS-14 | AG-3 PT | Multinucleate | Xinzhou city, Shanxi province  | This study |
| YJLC-5  | AG-A    | Binucleate    | Yangquan city, Shanxi province | This study |
| XJDS-10 | AG-3 PT | Multinucleate | Xinzhou city, Shanxi province  | This study |
| XKGS-5  | AG-3 PT | Multinucleate | Xinzhou city, Shanxi province  | This study |
| XJDM-5  | AG-3 PT | Multinucleate | Xinzhou city, Shanxi province  | This study |
| XKLQ-1  | AG-3 PT | Multinucleate | Xinzhou city, Shanxi province  | This study |
| XJDS-3  | AG-3 PT | Multinucleate | Xinzhou city, Shanxi province  | This study |
| XJDS-8  | AG-3 PT | Multinucleate | Xinzhou city, Shanxi province  | This study |
| XKSA-16 | AG-3 PT | Multinucleate | Xinzhou city, Shanxi province  | This study |
| XJDS-12 | AG-5    | Multinucleate | Xinzhou city, Shanxi province  | This study |
| XJDS-5  | AG-3 PT | Multinucleate | Xinzhou city, Shanxi province  | This study |
| DHXM-8  | AG-3 PT | Multinucleate | Datong city, Shanxi province   | This study |
| XKSA-12 | AG-3 PT | Multinucleate | Xinzhou city, Shanxi province  | This study |
| DHXM-16 | AG-3 PT | Multinucleate | Datong city, Shanxi province   | This study |
| XKSA-10 | AG-3 PT | Multinucleate | Xinzhou city, Shanxi province  | This study |
| SCCH-4  | AG-3 PT | Multinucleate | Changzhi city, Shanxi province | This study |
| XJDM-3  | AG-3 PT | Multinucleate | Xinzhou city, Shanxi province  | This study |
| XKSA-11 | AG-3 PT | Multinucleate | Xinzhou city, Shanxi province  | This study |
| XKSA-9  | AG-3 PT | Multinucleate | Xinzhou city, Shanxi province  | This study |

|        |         |               |                                     |              |
|--------|---------|---------------|-------------------------------------|--------------|
| AH-2   | AG-Fa   | Binucleate    | Bengbu city, Anhui province         | Reference 36 |
| AH-8H  | AG-3 PT | Multinucleate | Chuzhou city, Anhui province        | Reference 27 |
| AH-4   | AG-A    | Binucleate    | Chuzhou city, Anhui province        | Reference 36 |
| AH-1   | AG-4HGI | Multinucleate | Bengbu city, Anhui province         | Reference 27 |
| AH-10H | AG-3 PT | Multinucleate | Chuzhou city, Anhui province        | Reference 27 |
| AH-2H  | AG-3 PT | Multinucleate | Chuzhou city, Anhui province        | Reference 27 |
| AH-20H | AG-3 PT | Multinucleate | Ma'anshan city, Anhui province      | Reference 27 |
| AH-21H | AG-3 PT | Multinucleate | Ma'anshan city, Anhui province      | Reference 27 |
| LN-5   | AG-A    | Binucleate    | Fuxin city, Liaoning province       | Reference 36 |
| LN-6   | AG-A    | Binucleate    | Dandong city, Liaoning province     | Reference 36 |
| LN-2   | AG-K    | Binucleate    | Fuxin city, Liaoning province       | Reference 36 |
| LN-4   | AG-K    | Binucleate    | Fuxin city, Liaoning province       | Reference 36 |
| LN-7   | AG-A    | Binucleate    | Dandong city, Liaoning province     | Reference 36 |
| LN-4H  | AG-3 PT | Multinucleate | Shenyang city, Liaoning province    | Reference 27 |
| LN-1H  | AG-3 PT | Multinucleate | Shenyang city, Liaoning province    | Reference 27 |
| LN-6H  | AG-3 PT | Multinucleate | Shenyang city, Liaoning province    | Reference 27 |
| SC-8   | AG-A    | Binucleate    | Nanchong city, Sichuan province     | Reference 36 |
| SC-7   | AG-A    | Binucleate    | Dazhou city, Sichuan province       | Reference 36 |
| SC-9   | AG-5    | Multinucleate | Nanchong city, Sichuan province     | Reference 27 |
| SC-1   | AG-5    | Multinucleate | Guang'an city, Sichuan province     | Reference 27 |
| SC-9H  | AG-3 PT | Multinucleate | Suining city, Sichuan province      | Reference 27 |
| SC-2   | AG-A    | Binucleate    | Guang'an city, Sichuan province     | Reference 36 |
| SC-6   | AG-A    | Binucleate    | Dazhou city, Sichuan province       | Reference 36 |
| SC-3   | AG-A    | Binucleate    | Dazhou city, Sichuan province       | Reference 36 |
| SC-5   | AG-4HGI | Multinucleate | Dazhou city, Sichuan province       | Reference 27 |
| HL-47  | AG-A    | Binucleate    | Qiqihar city, Heilongjiang province | Reference 36 |

|         |           |               |                                                              |              |
|---------|-----------|---------------|--------------------------------------------------------------|--------------|
| HL-51   | AG-A      | Binucleate    | Qiqihar city, Heilongjiang province                          | Reference 36 |
| HL-20-1 | AG-A      | Binucleate    | Daqing city, Heilongjiang province                           | Reference 36 |
| CSF     | AG-4HGI   | Multinucleate | Qiqihar city, Heilongjiang province                          | Reference 27 |
| QYD     | AG-4HGI   | Multinucleate | Qiqihar city, Heilongjiang province                          | Reference 27 |
| HL-15   | AG-4HGIII | Multinucleate | Qiqihar city, Heilongjiang province                          | Reference 27 |
| HL-12   | AG-4HGIII | Multinucleate | Qiqihar city, Heilongjiang province                          | Reference 27 |
| HL-6    | AG-4HGIII | Multinucleate | Qiqihar city, Heilongjiang province                          | Reference 27 |
| HL-1H   | AG-3 PT   | Multinucleate | Qiqihar city, Heilongjiang province                          | Reference 27 |
| HL-41   | AG-4HGI   | Multinucleate | Qiqihar city, Heilongjiang province                          | Reference 27 |
| HL-ZA   | AG-W      | Binucleate    | Qiqihar city, Heilongjiang province                          | Reference 41 |
| HL-39   | AG-A      | Binucleate    | Heihe city, Heilongjiang province                            | Reference 36 |
| HL-CZ   | AG-W      | Binucleate    | Qiqihar city, Heilongjiang province                          | Reference 41 |
| HL-21   | AG-4HGII  | Multinucleate | Qiqihar city, Heilongjiang province                          | Reference 27 |
| HL-4-2  | AG-4HGI   | Multinucleate | Qiqihar city, Heilongjiang province                          | Reference 27 |
| HL-2-1  | AG-4HGIII | Multinucleate | Qiqihar city, Heilongjiang province                          | Reference 27 |
| HL-46   | AG-5      | Multinucleate | Qiqihar city, Heilongjiang province                          | Reference 27 |
| HL-5    | AG-5      | Multinucleate | Qiqihar city, Heilongjiang province                          | Reference 27 |
| HL-1    | AG-4HGIII | Multinucleate | Qiqihar city, Heilongjiang province                          | Reference 27 |
| HL-36   | AG-5      | Multinucleate | Greater Khingan administrative office, Heilongjiang province | Reference 27 |
| HL-19   | AG-4HGI   | Multinucleate | Daqing city, Heilongjiang province                           | Reference 27 |
| HL-16   | AG-5      | Multinucleate | Qiqihar city, Heilongjiang province                          | Reference 27 |
| HL-8    | AG-4HGI   | Multinucleate | Qiqihar city, Heilongjiang province                          | Reference 27 |
| HL-45   | AG-4HGI   | Multinucleate | Qiqihar city, Heilongjiang province                          | Reference 27 |
| HeN-8H  | AG-3 PT   | Multinucleate | Luoyang city, Henan province                                 | Reference 27 |
| HeN-7H  | AG-3 PT   | Multinucleate | Luoyang city, Henan province                                 | Reference 27 |
| HeN-10H | AG-3 PT   | Multinucleate | Luoyang city, Henan province                                 | Reference 27 |

|          |         |               |                                        |              |
|----------|---------|---------------|----------------------------------------|--------------|
| HeN-20   | AG-4HGI | Multinucleate | Zhoukou city, Henan province           | Reference 27 |
| ZJ-2-2   | AG-A    | Binucleate    | Rui'an city, Zhejiang province         | Reference 36 |
| ZJ-4-2   | AG-A    | Binucleate    | Rui'an city, Zhejiang province         | Reference 36 |
| ZJJH-3X  | AG-A    | Binucleate    | Jinhua city, Zhejiang province         | This study   |
| ZJJH-1X  | AG-A    | Binucleate    | Jinhua city, Zhejiang province         | This study   |
| ZJJH-2X  | AG-A    | Binucleate    | Jinhua city, Zhejiang province         | This study   |
| ZJJH-6X  | AG-A    | Binucleate    | Jinhua city, Zhejiang province         | This study   |
| ZJJH-5X  | AG-A    | Binucleate    | Jinhua city, Zhejiang province         | This study   |
| ZJ-4-1   | AG-A    | Binucleate    | Rui'an city, Zhejiang province         | Reference 36 |
| ZJJH-4X  | AG-3 PT | Multinucleate | Jinhua city, Zhejiang province         | This study   |
| ZJJH-7X  | AG-A    | Binucleate    | Jinhua city, Zhejiang province         | This study   |
| ZJ-3-1   | AG-4HGI | Multinucleate | Rui'an city, Zhejiang province         | Reference 27 |
| ZJ-2-1   | AG-4HGI | Multinucleate | Rui'an city, Zhejiang province         | Reference 27 |
| ZJ-5H    | AG-3 PT | Multinucleate | Wenzhou city, Zhejiang province        | Reference 27 |
| SX-2     | AG-Fa   | Binucleate    | Hanzhong city, Shaanxi province        | Reference 36 |
| SX-7     | AG-K    | Binucleate    | Weinan city, Shaanxi province          | Reference 36 |
| SX-5     | AG-5    | Multinucleate | Hanzhong city, Shaanxi province        | Reference 27 |
| SX-9     | AG-5    | Multinucleate | Weinan city, Shaanxi province          | Reference 27 |
| BJ-1     | AG-A    | Binucleate    | Yanqing district, Beijing municipality | Reference 36 |
| BJYQ-1X  | AG-4HGI | Multinucleate | Yanqing district, Beijing municipality | This study   |
| BJYQ-2X  | AG-4HGI | Multinucleate | Yanqing district, Beijing municipality | This study   |
| BJYQ-12X | AG-4HGI | Multinucleate | Yanqing district, Beijing municipality | This study   |
| BJYQ-3X  | AG-4HGI | Multinucleate | Yanqing district, Beijing municipality | This study   |
| BJYQ-4X  | AG-4HGI | Multinucleate | Yanqing district, Beijing municipality | This study   |
| BJYQ-5X  | AG-4HGI | Multinucleate | Yanqing district, Beijing municipality | This study   |
| BJYQ-6X  | AG-4HGI | Multinucleate | Yanqing district, Beijing municipality | This study   |

|          |         |               |                                                                 |              |
|----------|---------|---------------|-----------------------------------------------------------------|--------------|
| BJYQ-7X  | AG-4HGI | Multinucleate | Yanqing district, Beijing municipality                          | This study   |
| BJYQ-8X  | AG-4HGI | Multinucleate | Yanqing district, Beijing municipality                          | This study   |
| BJYQ-9X  | AG-4HGI | Multinucleate | Yanqing district, Beijing municipality                          | This study   |
| BJYQ-10X | AG-4HGI | Multinucleate | Yanqing district, Beijing municipality                          | This study   |
| BJYQ-11X | AG-4HGI | Multinucleate | Yanqing district, Beijing municipality                          | This study   |
| BJYQ-13X | AG-4HGI | Multinucleate | Yanqing district, Beijing municipality                          | This study   |
| BJYQ-14X | AG-4HGI | Multinucleate | Yanqing district, Beijing municipality                          | This study   |
| BJYQ-15X | AG-4HGI | Multinucleate | Yanqing district, Beijing municipality                          | This study   |
| BJYQ-16X | AG-4HGI | Multinucleate | Yanqing district, Beijing municipality                          | This study   |
| BJYQ-17X | AG-4HGI | Multinucleate | Yanqing district, Beijing municipality                          | This study   |
| BJYQ-18X | AG-4HGI | Multinucleate | Yanqing district, Beijing municipality                          | This study   |
| JL-5-1   | AG-A    | Binucleate    | Changchun city, Jilin province                                  | Reference 36 |
| JL-2     | AG-K    | Binucleate    | Changchun city, Jilin province                                  | Reference 36 |
| JSZJ-1X  | AG-1-IB | Multinucleate | Zhenjiang city, Jiangsu province                                | This study   |
| JSZJ-2X  | AG-1-IB | Multinucleate | Zhenjiang city, Jiangsu province                                | This study   |
| GZ-12    | AG-A    | Binucleate    | Tongren city, Guizhou province                                  | Reference 36 |
| GZ-3     | AG-5    | Multinucleate | Liupanshui city, Guizhou province                               | Reference 27 |
| GZ-17    | AG-5    | Multinucleate | Bijie city, Guizhou province                                    | Reference 27 |
| GZ-5     | AG-5    | Multinucleate | Qianxinan Buyi and Miao autonomous prefecture, Guizhou province | Reference 27 |
| GZ-10    | AG-A    | Binucleate    | Tongren city, Guizhou province                                  | Reference 36 |
| GZ-6     | AG-4HGI | Multinucleate | Qianxinan Buyi and Miao autonomous prefecture, Guizhou province | Reference 27 |
| GZ-20    | AG-5    | Multinucleate | Bijie city, Guizhou province                                    | Reference 27 |
| QHXN-5X  | AG-3 PT | Multinucleate | Xining city, Qinghai province                                   | This study   |
| QHXN-9X  | AG-3 PT | Multinucleate | Xining city, Qinghai province                                   | This study   |
| QHXN-14X | AG-3 PT | Multinucleate | Xining city, Qinghai province                                   | This study   |
| QHXN-19X | AG-3 PT | Multinucleate | Xining city, Qinghai province                                   | This study   |

|          |         |               |                               |              |
|----------|---------|---------------|-------------------------------|--------------|
| QHXN-16X | AG-5    | Multinucleate | Xining city, Qinghai province | This study   |
| QHXN-31X | AG-3 PT | Multinucleate | Xining city, Qinghai province | This study   |
| QHXN-3X  | AG-5    | Multinucleate | Xining city, Qinghai province | This study   |
| QHXN-28X | AG-3 PT | Multinucleate | Xining city, Qinghai province | This study   |
| QHXN-2X  | AG-3 PT | Multinucleate | Xining city, Qinghai province | This study   |
| QHXN-13X | AG-3 PT | Multinucleate | Xining city, Qinghai province | This study   |
| QHXN-10X | AG-3 PT | Multinucleate | Xining city, Qinghai province | This study   |
| QHXN-11X | AG-3 PT | Multinucleate | Xining city, Qinghai province | This study   |
| QHXN-1X  | AG-3 PT | Multinucleate | Xining city, Qinghai province | This study   |
| QHXN-22X | AG-3 PT | Multinucleate | Xining city, Qinghai province | This study   |
| QHXN-26X | AG-3 PT | Multinucleate | Xining city, Qinghai province | This study   |
| QHXN-23X | AG-3 PT | Multinucleate | Xining city, Qinghai province | This study   |
| QHXN-30X | AG-3 PT | Multinucleate | Xining city, Qinghai province | This study   |
| QHXN-17X | AG-3 PT | Multinucleate | Xining city, Qinghai province | This study   |
| QHXN-15X | AG-3 PT | Multinucleate | Xining city, Qinghai province | This study   |
| QHXN-8X  | AG-3 PT | Multinucleate | Xining city, Qinghai province | This study   |
| QHXN-25X | AG-3 PT | Multinucleate | Xining city, Qinghai province | This study   |
| QHXN-21X | AG-3 PT | Multinucleate | Xining city, Qinghai province | This study   |
| QHXN-4X  | AG-3 PT | Multinucleate | Xining city, Qinghai province | This study   |
| QHXN-29X | AG-3 PT | Multinucleate | Xining city, Qinghai province | This study   |
| QHXN-27X | AG-3 PT | Multinucleate | Xining city, Qinghai province | This study   |
| QHXN-12X | AG-3 PT | Multinucleate | Xining city, Qinghai province | This study   |
| QHXN-6X  | AG-3 PT | Multinucleate | Xining city, Qinghai province | This study   |
| QHXN-7X  | AG-3 PT | Multinucleate | Xining city, Qinghai province | This study   |
| FJ-9H    | AG-3 PT | Multinucleate | Ningde city, Fujian province  | Reference 27 |
| FJ-8H    | AG-3 PT | Multinucleate | Ningde city, Fujian province  | Reference 27 |

|         |         |               |                                                                    |              |
|---------|---------|---------------|--------------------------------------------------------------------|--------------|
| FJ-3H   | AG-3 PT | Multinucleate | Ningde city, Fujian province                                       | Reference 27 |
| NM-8    | AG-3 PT | Multinucleate | Ulanqab city, Inner Mongolia autonomous region                     | Reference 27 |
| NM-9    | AG-3 PT | Multinucleate | Ulanqab city, Inner Mongolia autonomous region                     | Reference 27 |
| NM-29   | AG-3 PT | Multinucleate | Ulanqab city, Inner Mongolia autonomous region                     | Reference 27 |
| NM-47   | AG-3 PT | Multinucleate | Ulanqab city, Inner Mongolia autonomous region                     | Reference 27 |
| NM-12   | AG-3 PT | Multinucleate | Ulanqab city, Inner Mongolia autonomous region                     | Reference 27 |
| NM-48   | AG-5    | Multinucleate | Ulanqab city, Inner Mongolia autonomous region                     | Reference 27 |
| NM-32   | AG-K    | Binucleate    | Xilin Gol league, Inner Mongolia autonomous region                 | Reference 36 |
| NM-9-2  | AG-3 PT | Multinucleate | Ulanqab city, Inner Mongolia autonomous region                     | Reference 27 |
| NM-39H  | AG-3 PT | Multinucleate | Ulanqab city, Inner Mongolia autonomous region                     | Reference 27 |
| NM-36H  | AG-3 PT | Multinucleate | Ulanqab city, Inner Mongolia autonomous region                     | Reference 27 |
| NM-18-2 | AG-5    | Multinucleate | Ulanqab city, Inner Mongolia autonomous region                     | Reference 27 |
| NM-45   | AG-5    | Multinucleate | Ulanqab city, Inner Mongolia autonomous region                     | Reference 27 |
| NM-20-2 | AG-5    | Multinucleate | Ulanqab city, Inner Mongolia autonomous region                     | Reference 27 |
| NM-22-2 | AG-5    | Multinucleate | Ulanqab city, Inner Mongolia autonomous region                     | Reference 27 |
| XJ-1H   | AG-4HGI | Multinucleate | Changji Prefecture Xinjiang Uygur autonomous region                | Reference 27 |
| XJ-7    | AG-5    | Multinucleate | Yili Kazak autonomous prefecture, Xinjiang Uygur autonomous region | Reference 27 |
| XJ-6    | AG-5    | Multinucleate | Changji prefecture Xinjiang Uygur autonomous region                | Reference 27 |
| XJ-4    | AG-5    | Multinucleate | Changji prefecture Xinjiang Uygur autonomous region                | Reference 27 |
| XJ-8    | AG-2-1  | Multinucleate | Yili Kazak autonomous prefecture, Xinjiang Uygur autonomous region | Reference 27 |
| XJZS-4X | AG-3 PT | Multinucleate | Yili Kazak autonomous prefecture, Xinjiang Uygur autonomous region | This study   |
| XJZS-1X | AG-3 PT | Multinucleate | Yili Kazak autonomous prefecture, Xinjiang Uygur autonomous region | This study   |
| CQ-14H  | AG-3 PT | Multinucleate | Xiushan county, Chongqing municipality                             | Reference 27 |
| CQ-4H   | AG-3 PT | Multinucleate | Pengshui county, Chongqing municipality                            | Reference 27 |
| GX-4H   | AG-3 PT | Multinucleate | Nanning city, Guangxi Zhuang autonomous region                     | Reference 27 |
| GD-2H   | AG-3 PT | Multinucleate | Yangjiang city, Guangdong province                                 | Reference 27 |

HuB-7H

AG-3 PT

Multinucleate

Jingzhou city, Hubei province

Reference 27

---
