# Supplementary material for: Diversity of Mycoviruses Present in Strains of Binucleate Rhizoctonia and Multinucleate Rhizoctonia, Causal Agents for Potato Stem Canker or Black Scurf
Source: MDPI journal article supplement (doi:10.3390/jof9020214), 2023-02-06
Supplement: s1 [file s1]

**Table S2** Alignment information of putative mycoviruses found in binucleate *Rhizoctonia* (BNR) and multinucleate *Rhizoctonia* (MNR) using metatranscriptome sequencing.

| No. | Contig ID        | Origin | Length (base pair) | Best Match                                         | Query Cover | Identity | E-value |
|-----|------------------|--------|--------------------|----------------------------------------------------|-------------|----------|---------|
| 1   | Second_Contig119 | BNR    | 1241               | Rhizoctonia solani mitovirus 31                    | 94%         | 78%      | 0       |
| 2   | First_Contig2    | BNR    | 2732               | Macrophomina phaseolina mitovirus 3                | 99%         | 89%      | 0       |
| 3   | First_Contig18   | BNR    | 1087               | Macrophomina phaseolina mitovirus 3                | 12%         | 96%      | 2e-15   |
| 4   | First_Contig70   | BNR    | 893                | Rhizoctonia solani mitovirus 13                    | 93%         | 42%      | 5e-57   |
| 5   | First_Contig144  | BNR    | 1236               | Rhizoctonia solani mitovirus 31                    | 64%         | 61%      | 1e-58   |
| 6   | First_Contig154  | BNR    | 3402               | Rhizoctonia solani mitovirus 15                    | 52%         | 49%      | 6e-164  |
| 7   | First_Contig409  | BNR    | 1162               | Fomitiporia mediterranea mitovirus 1               | 99%         | 59%      | 4e-160  |
| 8   | First_Contig1307 | BNR    | 528                | Rhizoctonia solani mitovirus 31                    | 88%         | 66%      | 2e-54   |
| 9   | First_Contig2516 | BNR    | 860                | Macrophomina phaseolina mitovirus 3                | 16%         | 98%      | 5e-15   |
| 10  | First_Contig3737 | BNR    | 1484               | Binucleate Rhizoctonia mitovirus K1                | 97%         | 88%      | 0       |
| 11  | First_Contig7320 | BNR    | 824                | Binucleate Rhizoctonia mitovirus K1                | 95%         | 85%      | 4e-161  |
| 12  | Contig4103       | BNR    | 697                | Binucleate Rhizoctonia mitovirus K1                | 90%         | 95%      | 3e-100  |
| 13  | First_Contig9072 | BNR    | 1070               | Binucleate Rhizoctonia mitovirus K1                | 99%         | 53%      | 1e-104  |
| 14  | First_Contig8194 | BNR    | 412                | Rhizoctonia solani mitovirus 31                    | 93%         | 67%      | 6e-54   |
| 15  | Contig1          | BNR    | 1327               | Rhizoctonia solani mitovirus 31                    | 68%         | 71%      | 6e-133  |
| 16  | Contig80         | BNR    | 1607               | Rhizoctonia solani mitovirus 9                     | 56%         | 72%      | 9e-139  |
| 17  | Contig101        | BNR    | 3400               | Epicoccum nigrum mitovirus 1                       | 70%         | 75%      | 0       |
| 18  | Contig332        | BNR    | 4062               | Rhizoctonia solani mitovirus 4                     | 42%         | 78%      | 0       |
| 19  | Contig562        | BNR    | 1882               | Plasmopara viticola lesion associated mitovirus 32 | 73%         | 37%      | 2e-75   |
| 20  | Contig563        | BNR    | 1880               | Mitovirus sp.                                      | 52%         | 39%      | 5e-65   |
| 21  | Contig653        | BNR    | 2382               | Rhizoctonia solani mitovirus 38                    | 74%         | 77%      | 0       |
| 22  | Contig664        | BNR    | 3094               | Rhizoctonia solani mitovirus 15                    | 58%         | 49%      | 2e-140  |
| 23  | Contig673        | BNR    | 2509               | Rhizoctonia solani mitovirus 36                    | 54%         | 46%      | 2e-98   |
| 24  | Contig828        | BNR    | 2860               | Rhizoctonia solani mitovirus 11                    | 66%         | 37%      | 5e-136  |

|    |             |     |      |                                         |      |     |        |
|----|-------------|-----|------|-----------------------------------------|------|-----|--------|
| 25 | Contig937   | BNR | 2104 | Rhizoctonia solani mitovirus 15         | 69%  | 53% | 7e-151 |
| 26 | Contig1176  | BNR | 1432 | Rhizoctonia solani mitovirus 15         | 24%  | 59% | 1e-37  |
| 27 | Contig1270  | BNR | 338  | Rhizoctonia solani mitovirus 22         | 99%  | 63% | 2e-39  |
| 28 | Contig1305  | BNR | 2502 | Rhizoctonia solani mitovirus 25         | 70%  | 44% | 2e-144 |
| 29 | Contig2131  | BNR | 1455 | Rhizoctonia solani mitovirus 22         | 76%  | 42% | 5e-69  |
| 30 | Contig3953  | BNR | 2511 | Rhizoctonia solani narnavirus 2         | 46%  | 83% | 0      |
| 31 | Contig8730  | BNR | 2389 | Rhizoctonia solani narnavirus 16        | 70%  | 44% | 3e-146 |
| 32 | Contig10104 | BNR | 451  | Macrophomina phaseolina mitovirus 3     | 29%  | 84% | 8e-16  |
| 33 | Contig18554 | BNR | 860  | Binucleate Rhizoctonia mitovirus K1     | 65%  | 41% | 1e-30  |
| 34 | Contig71160 | BNR | 228  | Rhizoctonia mitovirus 1 RS058           | 98%  | 52% | 1e-15  |
| 35 | Contig20517 | BNR | 2392 | Bremia lactucae associated narnavirus 3 | 93%  | 47% | 0      |
| 36 | Contig21707 | BNR | 691  | Rhizoctonia oryzae-sativae mitovirus 1  | 78%  | 40% | 3e-28  |
| 37 | Contig54552 | BNR | 350  | Rhizoctonia oryzae-sativae mitovirus 1  | 60%  | 39% | 6e-09  |
| 38 | Contig94713 | BNR | 267  | Rhizoctonia oryzae-sativae mitovirus 1  | 98%  | 35% | 1e-09  |
| 39 | Contig95306 | BNR | 258  | Rhizoctonia oryzae-sativae mitovirus 1  | 98%  | 33% | 8e-08  |
| 40 | Contig22408 | BNR | 683  | Ceratobasidium mitovirus A              | 99%  | 58% | 4e-64  |
| 41 | Contig24558 | BNR | 644  | Binucleate Rhizoctonia mitovirus K1     | 97%  | 85% | 1e-125 |
| 42 | Contig41888 | BNR | 870  | Binucleate Rhizoctonia mitovirus K1     | 76%  | 95% | 8e-148 |
| 43 | Contig31480 | BNR | 928  | Binucleate Rhizoctonia mitovirus K1     | 83%  | 85% | 1e-158 |
| 44 | Contig35207 | BNR | 274  | Binucleate Rhizoctonia mitovirus K1     | 99%  | 99% | 7e-54  |
| 45 | Contig33496 | BNR | 643  | Binucleate Rhizoctonia mitovirus K1     | 55%  | 45% | 8e-23  |
| 46 | Contig57251 | BNR | 212  | Binucleate Rhizoctonia mitovirus K1     | 80%  | 84% | 3e-24  |
| 47 | Contig60390 | BNR | 684  | Binucleate Rhizoctonia mitovirus K1     | 92%  | 98% | 2e-106 |
| 48 | Contig64008 | BNR | 347  | Binucleate Rhizoctonia mitovirus K1     | 99%  | 86% | 1e-62  |
| 49 | Contig71154 | BNR | 264  | Binucleate Rhizoctonia mitovirus K1     | 100% | 93% | 2e-47  |
| 50 | Contig87001 | BNR | 292  | Binucleate Rhizoctonia mitovirus K1     | 99%  | 94% | 5e-55  |

|    |                               |     |      |                                                            |      |     |        |
|----|-------------------------------|-----|------|------------------------------------------------------------|------|-----|--------|
| 51 | Contig90891                   | BNR | 458  | Binucleate Rhizoctonia mitovirus K1                        | 58%  | 78% | 1e-35  |
| 52 | Contig106434                  | BNR | 228  | Binucleate Rhizoctonia mitovirus K1                        | 86%  | 47% | 3e-09  |
| 53 | Contig6291                    | BNR | 2513 | Plasmopara viticola lesion associated ourmia-like virus 25 | 49%  | 38% | 2e-75  |
| 54 | Contig14760                   | BNR | 2479 | Apple ourmia-like virus 3                                  | 48%  | 42% | 2e-82  |
| 55 | Contig82664                   | BNR | 598  | Rhizoctonia solani ourmia-like virus 5                     | 90%  | 52% | 4e-44  |
| 56 | Contig27340                   | BNR | 1173 | Rhizoctonia solani ourmia-like virus 5                     | 91%  | 36% | 4e-60  |
| 57 | First_Contig332               | BNR | 8630 | Rhizoctonia solani fusarivirus 3                           | 50%  | 41% | 0      |
| 58 | Contig44768                   | BNR | 434  | Rhizoctonia solani fusarivirus 2                           | 99%  | 49% | 2e-37  |
| 59 | Contig36084                   | BNR | 493  | Rhizoctonia solani fusarivirus 1                           | 70%  | 45% | 1e-08  |
| 60 | Contig34159                   | BNR | 410  | Rhizoctonia solani fusarivirus 1                           | 96%  | 39% | 7e-20  |
| 61 | Contig53345                   | BNR | 780  | Rhizoctonia solani fusarivirus 2                           | 99%  | 39% | 6e-50  |
| 62 | Contig62229                   | BNR | 620  | Rhizoctonia solani fusarivirus 1                           | 57%  | 38% | 2e-15  |
| 63 | Contig68539                   | BNR | 341  | Rhizoctonia solani fusarivirus 1                           | 98%  | 50% | 3e-24  |
| 64 | Contig74796                   | BNR | 345  | Rhizoctonia solani fusarivirus 1                           | 100% | 65% | 5e-45  |
| 65 | Contig85663                   | BNR | 359  | Rhizoctonia solani fusarivirus 2                           | 98%  | 57% | 1e-39  |
| 66 | Contig89488                   | BNR | 323  | Rhizoctonia solani fusarivirus 1                           | 99%  | 89% | 2e-59  |
| 67 | Contig95547                   | BNR | 284  | Rhizoctonia solani fusarivirus 2                           | 97%  | 63% | 3e-33  |
| 68 | Contig96886                   | BNR | 366  | Rhizoctonia solani fusarivirus 2                           | 86%  | 39% | 6e-17  |
| 69 | First_Contig9011 <sup>a</sup> | BNR | 781  | Soybean leaf-associated negative-stranded RNA virus 4      | 99%  | 37% | 2e-38  |
| 70 | Contig45942                   | BNR | 673  | Soybean leaf-associated negative-stranded RNA virus 4      | 95%  | 27% | 2e-15  |
| 71 | Contig56190                   | BNR | 690  | Soybean leaf-associated negative-stranded RNA virus 4      | 88%  | 37% | 3e-25  |
| 72 | Contig61515                   | BNR | 599  | Soybean leaf-associated negative-stranded RNA virus 4      | 88%  | 28% | 5e-14  |
| 73 | Contig88823                   | BNR | 443  | Soybean leaf-associated negative-stranded RNA virus 4      | 97%  | 30% | 2e-08  |
| 74 | Contig8027                    | BNR | 1600 | Rhizoctonia solani beny-like virus 1                       | 99%  | 50% | 3e-175 |
| 75 | Contig15540                   | BNR | 1775 | Rhizoctonia solani dsRNA virus 1                           | 76%  | 67% | 0      |
| 76 | Contig14033                   | BNR | 3386 | Cyathus narnavirus A                                       | 42%  | 35% | 4e-59  |

|     |                   |     |      |                                                        |     |      |        |
|-----|-------------------|-----|------|--------------------------------------------------------|-----|------|--------|
| 77  | Contig110643      | BNR | 296  | Agaricus bisporus virus 15                             | 69% | 45%  | 6e-11  |
| 78  | Contig26831       | BNR | 838  | Rhizoctonia solani beny-like virus 4                   | 87% | 60%  | 5e-100 |
| 79  | Contig29937       | BNR | 1424 | Rhizoctonia solani beny-like virus 1                   | 71% | 42%  | 1e-68  |
| 80  | Contig32832       | BNR | 710  | Rhizoctonia solani beny-like virus 1                   | 99% | 58%  | 1e-80  |
| 81  | Contig47107       | BNR | 1431 | Rhizoctonia solani ourmia-like virus 5                 | 66% | 45%  | 2e-59  |
| 82  | Contig62035       | BNR | 2945 | Rhizoctonia solani hypovirus 3                         | 37% | 29%  | 5e-27  |
| 83  | Contig66387       | BNR | 1934 | Rhizoctonia solani beny-like virus 1                   | 43% | 43%  | 5e-63  |
| 84  | Contig40969       | BNR | 1684 | Rhizoctonia solani dsRNA virus 1                       | 99% | 80%  | 0      |
| 85  | First_Contig9432  | BNR | 2357 | Trichoderma hypovirus                                  | 43% | 32%  | 6e-40  |
| 86  | Contig50802       | BNR | 1152 | Sclerotium rolfsii hypovirus 4                         | 96% | 32%  | 4e-43  |
| 87  | Contig73093       | BNR | 787  | Ceratobasidium hypovirus-like                          | 95% | 30%  | 4e-23  |
| 88  | First_Contig10271 | BNR | 383  | Sclerotinia sclerotiorum negative-stranded RNA virus 4 | 83% | 41%  | 3e-13  |
| 89  | Contig82126       | BNR | 670  | Rhizoctonia solani endornavirus-RS002                  | 99% | 96%  | 2e-149 |
| 90  | First_Contig11029 | BNR | 645  | Rhizoctonia solani endornavirus-RS058-1                | 53% | 96%  | 1e-73  |
| 91  | Contig50008       | BNR | 380  | Rhizoctonia solani endornavirus-RS058-1                | 99% | 96%  | 3e-82  |
| 92  | Contig82339       | BNR | 270  | Rhizoctonia solani endornavirus-RS006-2                | 98% | 99%  | 8e-53  |
| 93  | Contig109202      | BNR | 251  | Rhizoctonia solani endornavirus-RS006-2                | 99% | 96%  | 1e-46  |
| 94  | Contig89133       | BNR | 325  | Rhizoctonia solani endornavirus-RS024-1                | 72% | 100% | 5e-47  |
| 95  | Contig91391       | BNR | 311  | Rhizoctonia solani endornavirus-RS058-1                | 99% | 100% | 7e-68  |
| 96  | Contig91548       | BNR | 282  | Rhizoctonia solani endornavirus-RS058-1                | 98% | 92%  | 4e-54  |
| 97  | Contig10662       | BNR | 329  | Morchella importuna endornavirus 1                     | 99% | 51%  | 6e-28  |
| 98  | Contig12120       | BNR | 1064 | Ceratobasidium endornavirus E                          | 95% | 34%  | 9e-33  |
| 99  | Contig15704       | BNR | 1762 | Ceratobasidium endornavirus E                          | 95% | 38%  | 2e-111 |
| 100 | Contig49209       | BNR | 440  | Ceratobasidium endornavirus E                          | 86% | 38%  | 3e-24  |
| 101 | Contig69335       | BNR | 311  | Ceratobasidium endornavirus F                          | 98% | 53%  | 2e-22  |
| 102 | Contig72702       | BNR | 356  | Ceratobasidium endornavirus F                          | 98% | 49%  | 4e-28  |

|     |              |     |      |                                             |      |      |        |
|-----|--------------|-----|------|---------------------------------------------|------|------|--------|
| 103 | Contig91043  | BNR | 216  | Ceratobasidium endornavirus A               | 90%  | 71%  | 4e-23  |
| 104 | Contig92293  | BNR | 570  | Ceratobasidium endornavirus F               | 98%  | 32%  | 3e-17  |
| 105 | Contig99476  | BNR | 273  | Rhizoctonia solani endornavirus 5           | 98%  | 51%  | 2e-23  |
| 106 | Contig111073 | BNR | 363  | Rhizoctonia solani endornavirus 4           | 86%  | 35%  | 6e-12  |
| 107 | Contig114961 | BNR | 305  | Rhizoctonia solani endornavirus 4           | 99%  | 38%  | 2e-12  |
| 108 | Contig114823 | BNR | 396  | Morchella importuna endornavirus 1          | 92%  | 39%  | 2e-21  |
| 109 | Contig116720 | BNR | 219  | Morchella importuna endornavirus 2          | 95%  | 45%  | 1e-10  |
| 110 | Contig83395  | BNR | 309  | Rhizoctonia solani endornavirus 6           | 100% | 68%  | 4e-39  |
| 111 | Contig80571  | BNR | 784  | Rosellinia necatrix partitivirus 5          | 71%  | 34%  | 2e-18  |
| 112 | Contig91437  | BNR | 404  | Rosellinia necatrix partitivirus 5          | 78%  | 34%  | 3e-12  |
| 113 | Contig106957 | BNR | 316  | Rhizoctonia solani partitivirus 6           | 95%  | 75%  | 1e-40  |
| 114 | Contig37038  | BNR | 1904 | Trichoderma atroviride partitivirus 1       | 96%  | 59%  | 0      |
| 115 | Contig67140  | BNR | 427  | Rhizoctonia solani dsRNA virus 1            | 65%  | 62%  | 4e-35  |
| 116 | Contig72348  | BNR | 288  | Rhizoctonia solani dsRNA virus 1            | 63%  | 70%  | 5e-19  |
| 117 | Contig115536 | BNR | 296  | Rhizoctonia solani dsRNA virus 2            | 99%  | 100% | 5e-62  |
| 118 | Contig47505  | BNR | 796  | Rhizoctonia solani partitivirus 6           | 89%  | 72%  | 2e-117 |
| 119 | Contig104035 | BNR | 208  | Heterobasidion partitivirus 15              | 93%  | 77%  | 2e-26  |
| 120 | Contig114545 | BNR | 306  | Heterobasidion RNA virus 6                  | 99%  | 63%  | 8e-35  |
| 121 | Contig34240  | BNR | 455  | Sclerotium rolfsii unassigned dsRNA virus 2 | 98%  | 54%  | 4e-48  |
| 122 | Contig72814  | BNR | 259  | Sclerotium rolfsii unassigned dsRNA virus 2 | 98%  | 53%  | 3e-18  |
| 123 | Contig85037  | BNR | 768  | Rhizoctonia fumigata mycovirus              | 90%  | 70%  | 5e-91  |
| 124 | Contig104756 | BNR | 375  | Rhizoctonia fumigata mycovirus              | 99%  | 36%  | 3e-09  |
| 125 | Contig112162 | BNR | 411  | Rhizoctonia fumigata mycovirus              | 98%  | 72%  | 6e-62  |
| 126 | Contig87186  | BNR | 585  | Beihai razor shell virus 4                  | 42%  | 37%  | 3e-07  |
| 127 | Contig92291  | BNR | 270  | Sclerotium rolfsii unassigned dsRNA virus 2 | 96%  | 66%  | 8e-23  |
| 128 | Contig93617  | BNR | 357  | Colletotrichum truncatum partitivirus 1     | 84%  | 80%  | 1e-50  |

|     |                          |     |      |                                                       |     |     |        |
|-----|--------------------------|-----|------|-------------------------------------------------------|-----|-----|--------|
| 129 | Contig60011              | BNR | 581  | Rhizoctonia solani beny-like virus 1                  | 97% | 46% | 7e-29  |
| 130 | Contig63614              | BNR | 632  | Rhizoctonia solani beny-like virus 1                  | 98% | 45% | 3e-57  |
| 131 | Contig66574              | BNR | 598  | Rhizoctonia solani beny-like virus 1                  | 60% | 53% | 5e-34  |
| 132 | Contig71291              | BNR | 268  | Rhizoctonia solani beny-like virus 1                  | 98% | 68% | 6e-36  |
| 133 | Contig83110              | BNR | 677  | Rhizoctonia solani beny-like virus 1                  | 99% | 67% | 4e-61  |
| 134 | Contig88989              | BNR | 635  | Rhizoctonia solani beny-like virus 1                  | 98% | 61% | 6e-82  |
| 135 | Contig89817              | BNR | 362  | Rhizoctonia solani beny-like virus 1                  | 96% | 55% | 3e-34  |
| 136 | Contig92007              | BNR | 827  | Rhizoctonia solani beny-like virus 1                  | 94% | 56% | 4e-106 |
| 137 | Contig38246              | BNR | 606  | Erysiphe necator associated ourmia-like virus 100     | 99% | 64% | 7e-82  |
| 138 | Contig75407 <sup>a</sup> | BNR | 315  | Dougjudy virga-like virus                             | 90% | 40% | 1e-15  |
| 139 | Contig26437              | BNR | 1974 | Rhizoctonia solani beny-like virus 1                  | 92% | 50% | 0      |
| 140 | Contig46362 <sup>a</sup> | BNR | 1062 | Soybean leaf-associated negative-stranded RNA virus 4 | 61% | 33% | 2e-23  |
| 141 | Contig75184              | BNR | 910  | Sclerotinia sclerotiorum fusarivirus 1                | 99% | 46% | 6e-82  |
| 142 | Contig92899              | BNR | 588  | Beihai sesamid crab virus 7                           | 95% | 37% | 7e-25  |
| 143 | Contig100064             | BNR | 391  | Phytophthora condilina RNA virus 2                    | 95% | 35% | 6e-19  |
| 144 | Contig105922             | BNR | 287  | Rhizoctonia solani flexivirus 2                       | 95% | 54% | 5e-27  |
| 145 | Contig160                | MNR | 3744 | Rhizoctonia solani mitovirus 48                       | 34% | 87% | 2e-77  |
| 146 | First_Contig131          | MNR | 3683 | Rhizoctonia solani mitovirus 15                       | 71% | 75% | 0      |
| 147 | Contig866                | MNR | 3570 | Epicoccum nigrum mitovirus 1                          | 57% | 55% | 0      |
| 148 | First_Contig106          | MNR | 3366 | Soybean leaf-associated mitovirus 5                   | 51% | 42% | 4e-126 |
| 149 | First_Contig7891         | MNR | 3344 | Rhizoctonia solani mitovirus 25                       | 72% | 46% | 0      |
| 150 | First_Contig31           | MNR | 3329 | Rhizoctonia solani mitovirus 32                       | 71% | 70% | 0      |
| 151 | First_Contig216          | MNR | 3244 | Rhizoctonia solani mitovirus 13                       | 84% | 55% | 0      |
| 152 | Contig5551               | MNR | 3231 | Rhizoctonia solani mitovirus 11                       | 79% | 50% | 0      |
| 153 | Contig786                | MNR | 3218 | Alternaria alternata mitovirus 1                      | 78% | 76% | 0      |
| 154 | First_Contig644          | MNR | 1533 | Rhizoctonia solani endornavirus 1                     | 46% | 49% | 2e-63  |

|     |                   |     |      |                                         |     |     |        |
|-----|-------------------|-----|------|-----------------------------------------|-----|-----|--------|
| 155 | First_Contig682   | MNR | 3193 | Rhizoctonia solani mitovirus 31         | 84% | 71% | 0      |
| 156 | Contig1522        | MNR | 3184 | Rhizoctonia solani mitovirus 15         | 73% | 42% | 0      |
| 157 | First_Contig1213  | MNR | 2015 | Erysiphales narna-like virus 3          | 53% | 36% | 2e-51  |
| 158 | Contig1750        | MNR | 3121 | Epicoccum nigrum mitovirus 1            | 77% | 45% | 0      |
| 159 | First_Contig37    | MNR | 3119 | Rhizoctonia solani mitovirus 1          | 49% | 74% | 0      |
| 160 | Contig686         | MNR | 3101 | Rhizoctonia solani mitovirus 15         | 80% | 47% | 0      |
| 161 | Contig8319        | MNR | 3098 | Rhizoctonia solani mitovirus 8          | 75% | 46% | 0      |
| 162 | First_Contig9140  | MNR | 917  | Ceratobasidium endornavirus C           | 84% | 32% | 1e-25  |
| 163 | First_Contig9844  | MNR | 633  | Apple ourmia-like virus 3               | 92% | 49% | 9e-51  |
| 164 | First_Contig10546 | MNR | 614  | Rhizoctonia solani endornavirus RS058-1 | 96% | 98% | 8e-130 |
| 165 | First_Contig10837 | MNR | 343  | Rhizoctonia solani fusarivirus 3        | 96% | 76% | 2e-36  |
| 166 | First_Contig11717 | MNR | 419  | Rhizoctonia solani fusarivirus 1        | 98% | 67% | 2e-59  |
| 167 | First_Contig11798 | MNR | 754  | Rhizoctonia solani beny-like virus 1    | 50% | 39% | 2e-17  |
| 168 | First_Contig72    | MNR | 3028 | Rhizoctonia solani mitovirus 31         | 87% | 79% | 0      |
| 169 | First_Contig50    | MNR | 2930 | Rhizoctonia solani mitovirus 31         | 86% | 78% | 0      |
| 170 | Contig2627        | MNR | 2878 | Rhizoctonia solani mitovirus 78         | 69% | 56% | 0      |
| 171 | Contig224         | MNR | 2823 | Rhizoctonia solani mitovirus 14         | 68% | 58% | 0      |
| 172 | Contig2016        | MNR | 2791 | Rhizoctonia solani mitovirus 11         | 67% | 42% | 2e-169 |
| 173 | First_Contig479   | MNR | 2753 | Rhizoctonia solani mitovirus 14         | 79% | 61% | 0      |
| 174 | Contig491         | MNR | 2728 | Macrophomina phaseolina mitovirus 3     | 81% | 36% | 1e-116 |
| 175 | First_Contig1233  | MNR | 2725 | Epicoccum nigrum mitovirus 1            | 84% | 53% | 1e-176 |
| 176 | Contig4839        | MNR | 2718 | Rhizoctonia solani mitovirus 11         | 77% | 39% | 2e-158 |
| 177 | Contig321         | MNR | 211  | Ceratobasidium partitivirus             | 96% | 73% | 6e-27  |
| 178 | Contig785         | MNR | 2704 | Rhizoctonia solani mitovirus 38         | 78% | 78% | 0      |
| 179 | Contig3042        | MNR | 2694 | Rhizoctonia solani mitovirus 15         | 87% | 69% | 0      |
| 180 | Contig78          | MNR | 2691 | Rhizoctonia solani mitovirus 76         | 82% | 84% | 0      |

|     |                  |     |      |                                         |     |     |        |
|-----|------------------|-----|------|-----------------------------------------|-----|-----|--------|
| 181 | Contig4210       | MNR | 2667 | Neofusicoccum parvum mitovirus 1        | 78% | 88% | 0      |
| 182 | First_Contig170  | MNR | 2642 | Rhizoctonia mitovirus 1                 | 97% | 99% | 0      |
| 183 | First_Contig425  | MNR | 2591 | Rhizoctonia solani mitovirus 15         | 86% | 65% | 0      |
| 184 | First_Contig42   | MNR | 2590 | Rhizoctonia solani mitovirus 7          | 98% | 54% | 0      |
| 185 | Contig428        | MNR | 2438 | Rhizoctonia solani mitovirus 78         | 79% | 81% | 0      |
| 186 | First_Contig177  | MNR | 2422 | Rhizoctonia solani mitovirus 1          | 57% | 70% | 0      |
| 187 | First_Contig14   | MNR | 2393 | Rhizoctonia solani mitovirus 7          | 42% | 53% | 1e-72  |
| 188 | First_Contig91   | MNR | 2333 | Rhizoctonia solani mitovirus 13         | 73% | 61% | 0      |
| 189 | First_Contig88   | MNR | 2314 | Rhizoctonia solani mitovirus 49         | 89% | 56% | 0      |
| 190 | First_Contig19   | MNR | 2278 | Macrophomina phaseolina mitovirus 3     | 86% | 63% | 3e-105 |
| 191 | First_Contig70   | MNR | 2256 | Rhizoctonia solani mitovirus 35         | 49% | 44% | 2e-111 |
| 192 | First_Contig36   | MNR | 2169 | Rhizoctonia solani mitovirus 1          | 56% | 68% | 0      |
| 193 | Contig716        | MNR | 1168 | Epicoccum nigrum mitovirus 1            | 87% | 67% | 5e-150 |
| 194 | Contig1292       | MNR | 2153 | Epicoccum nigrum mitovirus 1            | 75% | 72% | 0      |
| 195 | Second_Contig831 | MNR | 2544 | Rhizoctonia solani fusarivirus 5        | 39% | 44% | 2e-77  |
| 196 | First_Contig10   | MNR | 1700 | Rhizoctonia solani mitovirus 25         | 78% | 62% | 0      |
| 197 | Contig620        | MNR | 2061 | Rhizoctonia solani mitovirus 21         | 95% | 61% | 0      |
| 198 | First_Contig86   | MNR | 696  | Rhizoctonia solani mitovirus 25         | 77% | 64% | 3e-70  |
| 299 | Contig681        | MNR | 1986 | Grapevine-associated mitovirus 19       | 82% | 54% | 0      |
| 200 | First_Contig7391 | MNR | 1925 | Erysiphe necator associated mitovirus 8 | 90% | 66% | 0      |
| 201 | First_Contig255  | MNR | 1406 | Lichen partiti-like RNA virus 2         | 90% | 29% | 4e-49  |
| 202 | First_Contig1819 | MNR | 1893 | Rhizoctonia solani mitovirus 4          | 62% | 42% | 1e-82  |
| 203 | Contig8519       | MNR | 1742 | Grapevine-associated mitovirus 10       | 65% | 85% | 0      |
| 204 | Contig426        | MNR | 1741 | Rhizoctonia solani mitovirus 60         | 78% | 80% | 0      |
| 205 | Second_Contig17  | MNR | 1719 | Rhizoctonia solani mitovirus 31         | 91% | 69% | 0      |
| 206 | First_Contig725  | MNR | 396  | Heterobasidion partitivirus 5           | 81% | 56% | 6e-32  |



|     |                               |     |       |                                                       |      |     |        |
|-----|-------------------------------|-----|-------|-------------------------------------------------------|------|-----|--------|
| 207 | First_Contig760               | MNR | 785   | Ceratobasidium partitivirus                           | 99%  | 65% | 5e-116 |
| 208 | Contig2667                    | MNR | 1715  | Rhizoctonia solani mitovirus 40                       | 70%  | 83% | 0      |
| 209 | First_Contig871               | MNR | 672   | Cherry chlorotic rusty spot associated partitivirus   | 83%  | 44% | 5e-44  |
| 210 | First_Contig941               | MNR | 720   | Rhizoctonia solani dsRNA virus 4                      | 99%  | 62% | 1e-101 |
| 211 | First_Contig1194              | MNR | 671   | Gaeumannomyces tritici partitivirus 2                 | 88%  | 46% | 4e-52  |
| 212 | Contig612                     | MNR | 1572  | Rhizoctonia solani mitovirus 65                       | 86%  | 52% | 8e-147 |
| 213 | First_Contig1276              | MNR | 1078  | Beihai sesamoid crab virus 7                          | 99%  | 30% | 6e-36  |
| 214 | Contig465                     | MNR | 1465  | Rhizoctonia solani mitovirus 33                       | 57%  | 63% | 7e-117 |
| 215 | First_Contig1893              | MNR | 1202  | Grapevine rupestris vein feathering virus             | 82%  | 25% | 4e-08  |
| 216 | First_Contig3984              | MNR | 3270  | Rhizoctonia solani fusarivirus 3                      | 90%  | 64% | 0      |
| 217 | First_Contig4140              | MNR | 2730  | Rhizoctonia solani fusarivirus 3                      | 5%   | 64% | 3e-07  |
| 218 | First_Contig4586              | MNR | 1064  | Rhizoctonia solani endornavirus-RS002                 | 99%  | 99% | 0      |
| 219 | First_Contig6724              | MNR | 10581 | Rhizoctonia solani fusarivirus 1                      | 43%  | 72% | 0      |
| 220 | First_Contig6982              | MNR | 2349  | Rhizoctonia solani endornavirus 1                     | 78%  | 43% | 1e-143 |
| 221 | Contig5799                    | MNR | 1456  | Grapevine-associated mitovirus 10                     | 76%  | 89% | 0      |
| 222 | First_Contig8109              | MNR | 2134  | Rhizoctonia solani fusarivirus 3                      | 93%  | 47% | 6e-145 |
| 223 | First_Contig8125              | MNR | 1551  | Bipolaris oryzae hypovirus 1                          | 49%  | 28% | 5e-11  |
| 224 | First_Contig8371              | MNR | 1183  | Sclerotium hydrophilum virus 1                        | 87%  | 77% | 0      |
| 225 | First_Contig8445              | MNR | 8619  | Rhizoctonia solani endornavirus 1                     | 46%  | 24% | 2e-72  |
| 226 | First_Contig8786 <sup>a</sup> | MNR | 1736  | Soybean leaf-associated negative-stranded RNA virus 4 | 99%  | 33% | 2e-79  |
| 227 | First_Contig9052              | MNR | 1941  | Rhizoctonia solani fusarivirus 1                      | 99%  | 52% | 0      |
| 228 | First_Contig9253              | MNR | 1067  | Sinomenium acutum tymovirus 1                         | 93%  | 72% | 2e-21  |
| 229 | First_Contig9863              | MNR | 1453  | Rhizoctonia solani hypovirus 1                        | 99%  | 63% | 0      |
| 230 | First_Contig9967              | MNR | 1526  | Rhizoctonia solani fusarivirus 3                      | 99%  | 79% | 0      |
| 231 | First_Contig10634             | MNR | 1986  | Rhizoctonia solani endornavirus                       | 100% | 36% | 2e-146 |
| 232 | First_Contig10788             | MNR | 1200  | Ceratobasidium endornavirus C                         | 95%  | 33% | 5e-51  |

|     |                        |     |      |                                       |      |     |        |
|-----|------------------------|-----|------|---------------------------------------|------|-----|--------|
| 233 | First_Contig12252      | MNR | 1155 | Rhizoctonia solani endornavirus-RS002 | 99%  | 98% | 0      |
| 234 | First_Contig12377      | MNR | 885  | Ceratobasidium partitivirus           | 99%  | 37% | 4e-154 |
| 235 | First_Contig12664      | MNR | 902  | Armillaria mellea ourmia-like virus 1 | 98%  | 32% | 6e-28  |
| 236 | Contig322 <sup>a</sup> | MNR | 1216 | Ceratobasidium partitivirus           | 98%  | 62% | 6e-178 |
| 237 | First_Contig577        | MNR | 1423 | Rhizoctonia solani mitovirus 64       | 99%  | 87% | 0      |
| 238 | Contig7906             | MNR | 1390 | Rhizoctonia solani mitovirus 22       | 78%  | 76% | 2e-143 |
| 239 | First_Contig64         | MNR | 1387 | Rhizoctonia solani mitovirus 22       | 66%  | 75% | 0      |
| 240 | First_Contig180        | MNR | 1319 | Rhizoctonia solani mitovirus 88       | 72%  | 75% | 4e-158 |
| 241 | First_Contig160        | MNR | 1312 | Rhizoctonia solani mitovirus 48       | 34%  | 87% | 2e-77  |
| 242 | Contig281              | MNR | 1303 | Rhizoctonia solani mitovirus 76       | 99%  | 79% | 0      |
| 243 | Contig466              | MNR | 1250 | Epicoccum nigrum mitovirus 1          | 55%  | 57% | 2e-131 |
| 244 | Contig184              | MNR | 1235 | Rhizoctonia solani mitovirus 15       | 69%  | 36% | 3e-37  |
| 245 | First_Contig1282       | MNR | 1133 | Rhizoctonia solani mitovirus 31       | 72%  | 73% | 8e-134 |
| 246 | Contig303              | MNR | 1119 | Rhizoctonia solani mitovirus 5        | 37%  | 42% | 7e-13  |
| 247 | Contig1062             | MNR | 1787 | Rhizoctonia solani partitivirus 11    | 80%  | 43% | 7e-125 |
| 248 | First_Contig94         | MNR | 1114 | Rhizoctonia solani mitovirus 14       | 68%  | 48% | 1e-60  |
| 249 | First_Contig968        | MNR | 1066 | Rhizoctonia solani mitovirus 7        | 57%  | 64% | 5e-26  |
| 250 | First_Contig28         | MNR | 967  | Rhizoctonia solani mitovirus 13       | 72%  | 46% | 2e-50  |
| 251 | Contig1247             | MNR | 2262 | Rhizoctonia cerealis mitovirus        | 74%  | 83% | 0      |
| 252 | Contig648              | MNR | 941  | Rhizoctonia solani mitovirus 14       | 87%  | 48% | 2e-67  |
| 253 | Contig680              | MNR | 884  | Rhizoctonia solani mitovirus 64       | 99%  | 88% | 1e-172 |
| 254 | Contig7223             | MNR | 832  | Rhizoctonia solani mitovirus 65       | 98%  | 80% | 3e-149 |
| 255 | Contig269              | MNR | 814  | Rhizoctonia solani mitovirus 48       | 88%  | 72% | 1e-109 |
| 256 | First_Contig572        | MNR | 810  | Rhizoctonia solani mitovirus 65       | 100% | 96% | 0      |
| 257 | First_Contig102        | MNR | 800  | Soybean leaf-associated mitovirus 5   | 59%  | 47% | 2e-34  |
| 258 | Contig1903             | MNR | 1076 | Rhizoctonia solani fusarivirus 1      | 99%  | 43% | 8e-74  |

|     |                  |     |      |                                      |      |     |        |
|-----|------------------|-----|------|--------------------------------------|------|-----|--------|
| 259 | Contig13693      | MNR | 788  | Rhizoctonia solani mitovirus 65      | 94%  | 52% | 7e-52  |
| 260 | Contig2123       | MNR | 705  | Rhizoctonia solani mitovirus 25      | 76%  | 65% | 2e-71  |
| 261 | First_Contig651  | MNR | 775  | Rhizoctonia solani mitovirus 38      | 99%  | 74% | 2e-120 |
| 262 | Contig2728       | MNR | 765  | Rhizoctonia solani mitovirus 64      | 99%  | 93% | 1e-129 |
| 263 | Contig3605       | MNR | 756  | Rhizoctonia solani mitovirus 25      | 100% | 61% | 2e-99  |
| 264 | First_Contig62   | MNR | 748  | Rhizoctonia solani mitovirus 4       | 93%  | 56% | 3e-80  |
| 265 | Contig3922       | MNR | 744  | Rhizoctonia solani mitovirus 14      | 95%  | 63% | 2e-64  |
| 266 | Contig2651       | MNR | 734  | Rhizoctonia solani mitovirus 48      | 99%  | 80% | 1e-128 |
| 267 | First_Contig2442 | MNR | 733  | Rhizoctonia solani mitovirus 4       | 93%  | 52% | 2e-64  |
| 268 | Contig2656       | MNR | 493  | Rhizoctonia solani mitovirus 25      | 99%  | 57% | 2e-54  |
| 269 | Contig2660       | MNR | 294  | Epicoccum nigrum mitovirus 1         | 98%  | 79% | 3e-48  |
| 270 | Contig1141       | MNR | 723  | Rhizoctonia solani mitovirus 88      | 99%  | 84% | 1e-142 |
| 271 | First_Contig305  | MNR | 673  | Rhizoctonia solani mitovirus 9       | 99%  | 78% | 6e-124 |
| 272 | First_Contig105  | MNR | 658  | Rhizoctonia solani mitovirus 64      | 98%  | 90% | 1e-119 |
| 273 | Contig3116       | MNR | 283  | Fomitiporia mediterranea mitovirus 1 | 96%  | 77% | 2e-40  |
| 274 | Contig120504     | MNR | 640  | Binucleate Rhizoctonia mitovirus K1  | 95%  | 40% | 3e-35  |
| 275 | Contig3535       | MNR | 1117 | Rhizoctonia solani narnavirus 19     | 51%  | 57% | 1e-66  |
| 276 | Contig7189       | MNR | 629  | Rhizoctonia solani mitovirus 31      | 94%  | 74% | 4e-50  |
| 277 | Contig1832       | MNR | 578  | Rhizoctonia solani mitovirus 21      | 99%  | 46% | 8e-41  |
| 278 | Contig80151      | MNR | 573  | Rhizoctonia mitovirus 1 RS058-1      | 98%  | 43% | 6e-38  |
| 279 | First_Contig1443 | MNR | 572  | Rhizoctonia solani mitovirus 55      | 99%  | 89% | 1e-118 |
| 280 | Contig2164       | MNR | 567  | Macrophomina phaseolina mitovirus 3  | 60%  | 46% | 1e-19  |
| 281 | Contig5246       | MNR | 332  | Heterobasidion partitivirus 5        | 96%  | 55% | 2e-31  |
| 282 | Contig5269       | MNR | 1542 | Rhizoctonia solani fusarivirus 2     | 75%  | 54% | 5e-142 |
| 283 | Contig6544       | MNR | 567  | Rhizoctonia solani mitovirus 63      | 95%  | 53% | 3e-43  |
| 284 | First_Contig641  | MNR | 562  | Rhizoctonia solani mitovirus 36      | 99%  | 56% | 7e-62  |

|     |                 |     |      |                                       |      |      |        |
|-----|-----------------|-----|------|---------------------------------------|------|------|--------|
| 285 | First_Contig408 | MNR | 525  | Rhizoctonia solani mitovirus 88       | 99%  | 82%  | 2e-95  |
| 286 | Contig2620      | MNR | 489  | Rhizoctonia solani mitovirus 25       | 82%  | 60%  | 3e-53  |
| 287 | Contig6543      | MNR | 1552 | Rhizoctonia solani mitovirus 63       | 61%  | 47%  | 2e-59  |
| 288 | Contig3499      | MNR | 483  | Rhizoctonia solani mitovirus 25       | 99%  | 45%  | 3e-33  |
| 289 | Contig1152      | MNR | 440  | Rhizoctonia solani mitovirus 13       | 98%  | 43%  | 1e-25  |
| 290 | Contig95483     | MNR | 436  | Binucleate Rhizoctonia mitovirus K1   | 99%  | 90%  | 2e-67  |
| 291 | Contig660       | MNR | 430  | Rhizoctonia solani mitovirus 14       | 96%  | 61%  | 1e-46  |
| 292 | Contig92951     | MNR | 415  | Binucleate Rhizoctonia mitovirus K1   | 99%  | 83%  | 3e-75  |
| 293 | Contig1246      | MNR | 405  | Rhizoctonia solani mitovirus 55       | 97%  | 47%  | 1e-29  |
| 294 | Contig547       | MNR | 388  | Rhizoctonia solani mitovirus 55       | 96%  | 98%  | 1e-70  |
| 295 | Contig8681      | MNR | 532  | Rhizoctonia solani partitivirus 10    | 99%  | 100% | 1e-124 |
| 296 | Contig9451      | MNR | 1760 | Rhizoctonia solani dsRNA virus 3      | 87%  | 88%  | 0      |
| 297 | Contig129856    | MNR | 386  | Fusarium poae mitovirus 2             | 98%  | 75%  | 6e-49  |
| 298 | Contig10054     | MNR | 6500 | Sinomenium acutum tymovirus 1         | 62%  | 33%  | 2e-137 |
| 299 | Contig11085     | MNR | 561  | Rhizoctonia solani mitovirus 119      | 100% | 94%  | 9e-117 |
| 300 | Contig11265     | MNR | 331  | Ceratobasidium endornavirus E         | 99%  | 45%  | 2e-24  |
| 301 | Contig11844     | MNR | 844  | Rhizoctonia cerealis mitovirus        | 89%  | 88%  | 1e-151 |
| 302 | Contig12317     | MNR | 276  | Tomato blistering mosaic virus        | 95%  | 43%  | 4e-12  |
| 303 | Contig13593     | MNR | 307  | Bolbocoleon piliferum toti-like virus | 97%  | 40%  | 8e-15  |
| 304 | Contig13669     | MNR | 738  | Alphaendornavirus sp.                 | 89%  | 45%  | 5e-57  |
| 305 | Contig606       | MNR | 379  | Rhizoctonia solani mitovirus 80       | 49%  | 84%  | 4e-24  |
| 306 | Contig15082     | MNR | 1737 | Rhizoctonia solani dsRNA virus 2      | 84%  | 100% | 0      |
| 307 | Contig15103     | MNR | 278  | Rhizoctonia solani fusarivirus 4      | 99%  | 89%  | 1e-51  |
| 308 | Contig15771     | MNR | 365  | Rhizoctonia solani partitivirus 11    | 98%  | 96%  | 1e-76  |
| 309 | Contig16297     | MNR | 1278 | Rhizoctonia solani partitivirus 10    | 92%  | 95%  | 0      |
| 310 | Contig16400     | MNR | 1962 | Heterobasidion partitivirus 5         | 91%  | 68%  | 0      |

|     |                          |     |      |                                               |     |     |        |
|-----|--------------------------|-----|------|-----------------------------------------------|-----|-----|--------|
| 311 | Contig17018              | MNR | 1727 | Rhizoctonia solani partitivirus 11            | 87% | 79% | 0      |
| 312 | Contig17211              | MNR | 408  | Agaricus bisporus virus 14                    | 75% | 37% | 4e-12  |
| 313 | Contig17796              | MNR | 1206 | Rhizoctonia solani ourmia-like virus 7        | 58% | 76% | 2e-113 |
| 314 | Contig18226              | MNR | 1853 | Rhizoctonia solani dsRNA virus 3              | 93% | 96% | 0      |
| 315 | Contig18683              | MNR | 380  | Rhizoctonia solani partitivirus 11            | 99% | 92% | 2e-77  |
| 316 | Contig19341              | MNR | 464  | Rhizoctonia solani endornavirus 5             | 96% | 50% | 1e-39  |
| 317 | Contig19560              | MNR | 292  | Rhizoctonia solani endornavirus 6             | 93% | 80% | 1e-42  |
| 318 | Contig19933              | MNR | 1758 | Ceratobasidium partitivirus CP-c2             | 71% | 32% | 7e-49  |
| 319 | Contig20508 <sup>a</sup> | MNR | 619  | Rhizoctonia solani negative-stranded virus 7  | 99% | 86% | 5e-128 |
| 320 | Contig20650              | MNR | 596  | Rhizoctonia cerealis mitovirus                | 57% | 48% | 2e-26  |
| 321 | Contig21980 <sup>a</sup> | MNR | 434  | Rhizoctonia solani negative-stranded virus 3  | 99% | 87% | 2e-78  |
| 322 | Contig27958              | MNR | 1070 | Rhizoctonia solani fusarivirus 3              | 97% | 40% | 1e-71  |
| 323 | Contig29510              | MNR | 1939 | Sclerotium hydrophilum virus 1                | 46% | 76% | 1e-148 |
| 324 | Contig29690              | MNR | 1402 | Rhizoctonia solani narnavirus 18              | 99% | 45% | 1e-119 |
| 325 | Contig30496              | MNR | 545  | Rhizoctonia solani fusarivirus 3              | 98% | 75% | 1e-75  |
| 326 | Contig30497              | MNR | 478  | Rhizoctonia solani fusarivirus 3              | 99% | 78% | 9e-69  |
| 327 | Contig30656 <sup>a</sup> | MNR | 612  | Rhizoctonia solani negative-stranded virus 2  | 99% | 70% | 1e-95  |
| 328 | Contig31178              | MNR | 936  | Rhizoctonia solani endornavirus - RS058-1     | 99% | 95% | 0      |
| 329 | Contig31811              | MNR | 1571 | XiangYun toti-like virus 7                    | 71% | 29% | 8e-40  |
| 330 | Contig32893              | MNR | 6545 | Erysiphe necator associated beny-like virus 1 | 63% | 32% | 6e-118 |
| 331 | Contig32998              | MNR | 5175 | Rhizoctonia solani endornavirus               | 93% | 33% | 0      |
| 332 | Contig33251              | MNR | 3235 | Sclerotium rolfsii hypovirus 7                | 54% | 29% | 1e-30  |
| 333 | Contig33646              | MNR | 2279 | Rhizoctonia solani fusarivirus 4              | 50% | 30% | 6e-43  |
| 334 | Contig33717              | MNR | 1064 | Rhizoctonia solani fusarivirus 3              | 99% | 87% | 2e-176 |
| 335 | Contig34369              | MNR | 481  | Ceratobasidium endornavirus 1                 | 87% | 44% | 3e-28  |
| 336 | Contig34791              | MNR | 448  | Rhizoctonia solani endornavirus-RS002         | 99% | 98% | 5e-91  |

|     |             |     |      |                                               |      |     |        |
|-----|-------------|-----|------|-----------------------------------------------|------|-----|--------|
| 337 | Contig34792 | MNR | 519  | Rhizoctonia solani endornavirus-RS058-1       | 99%  | 98% | 5e-119 |
| 338 | Contig35176 | MNR | 413  | Rhizoctonia solani fusarivirus 4              | 99%  | 99% | 1e-87  |
| 339 | Contig36244 | MNR | 262  | Plasmopara viticola associated Partitivirus 9 | 69%  | 49% | 3e-11  |
| 340 | Contig36646 | MNR | 1484 | Rhizoctonia solani narnavirus 4               | 99%  | 67% | 0      |
| 341 | Contig37102 | MNR | 1770 | Sinomenium acutum tymovirus 1                 | 35%  | 48% | 7e-54  |
| 342 | Contig37997 | MNR | 349  | Beijing alphaendornavirus 3                   | 87%  | 67% | 2e-30  |
| 343 | Contig39868 | MNR | 1605 | Rhizoctonia solani hypovirus 10               | 99%  | 64% | 0      |
| 344 | Contig42081 | MNR | 2601 | Rhizoctonia solani fusarivirus 3              | 98%  | 50% | 0      |
| 345 | Contig42228 | MNR | 319  | Rhizoctonia solani dsRNA virus 19             | 97%  | 45% | 2e-22  |
| 346 | Contig42359 | MNR | 866  | Rhizoctonia solani fusarivirus 4              | 99%  | 94% | 0      |
| 347 | Contig42360 | MNR | 2906 | Rhizoctonia solani fusarivirus 4              | 99%  | 88% | 0      |
| 348 | Contig44045 | MNR | 539  | Monilinia fructicola beny-like virus 1        | 96%  | 49% | 5e-49  |
| 349 | Contig45154 | MNR | 1829 | Rhizoctonia solani fusarivirus 4              | 94%  | 77% | 0      |
| 350 | Contig45966 | MNR | 531  | Rhizoctonia solani endornavirus - RS058-1     | 46%  | 48% | 1e-17  |
| 351 | Contig46786 | MNR | 244  | Rhizoctonia solani beny-like virus 1          | 95%  | 69% | 1e-34  |
| 352 | Contig47414 | MNR | 351  | Rhizoctonia solani endornavirus 6             | 94%  | 52% | 8e-22  |
| 353 | Contig47581 | MNR | 402  | Rhizoctonia solani fusarivirus 3              | 100% | 75% | 1e-60  |
| 354 | Contig48146 | MNR | 818  | Riboviria sp.                                 | 98%  | 36% | 4e-44  |
| 355 | Contig49793 | MNR | 483  | Rhizoctonia solani endornavirus-RS002         | 100% | 98% | 7e-101 |
| 356 | Contig49822 | MNR | 312  | Rhizoctonia oryzae-sativae partitivirus 5     | 99%  | 54% | 3e-25  |
| 357 | Contig49823 | MNR | 341  | Sarcosphaera coronaria partitivirus           | 89%  | 52% | 3e-23  |
| 358 | Contig50229 | MNR | 505  | Agaricus bisporus virus 13                    | 99%  | 39% | 3e-23  |
| 359 | Contig50570 | MNR | 546  | Rhizoctonia solani fusarivirus 3              | 99%  | 71% | 6e-65  |
| 360 | Contig52202 | MNR | 431  | Rhizoctonia solani endornavirus-RS002         | 99%  | 98% | 7e-88  |
| 361 | Contig52535 | MNR | 233  | Helicobasidium purpureum partitivirus         | 97%  | 86% | 3e-40  |
| 362 | Contig52736 | MNR | 472  | Rhizoctonia solani endornavirus-RS006-2       | 99%  | 99% | 7e-106 |

|     |                           |     |      |                                                            |     |      |        |
|-----|---------------------------|-----|------|------------------------------------------------------------|-----|------|--------|
| 363 | Contig52756               | MNR | 494  | Sichuan mosquito Beny-like virus                           | 97% | 43%  | 1e-34  |
| 364 | Contig53116               | MNR | 317  | Rhizoctonia solani endornavirus-RS024-1                    | 97% | 98%  | 2e-63  |
| 365 | Contig53346 <sup>a</sup>  | MNR | 655  | Soybean leaf-associated negative-stranded RNA virus 4      | 69% | 32%  | 3e-16  |
| 366 | Contig53647               | MNR | 833  | Rhizoctonia solani ourmia-like virus 7                     | 64% | 58%  | 3e-55  |
| 367 | Contig54477               | MNR | 362  | Sinomenium acutum tymovirus 1                              | 94% | 53%  | 4e-31  |
| 368 | Contig55181               | MNR | 1205 | Erysiphe necator associated negative-stranded RNA virus 14 | 49% | 27%  | 2e-09  |
| 369 | Contig55379               | MNR | 787  | Sarcosphaera coronaria partitivirus                        | 86% | 32%  | 5e-22  |
| 370 | Contig55714               | MNR | 2063 | Rhizoctonia solani endornavirus-RS002                      | 85% | 98%  | 0      |
| 371 | Contig56398               | MNR | 1845 | Rhizoctonia solani hypovirus 10                            | 99% | 89%  | 0      |
| 372 | Contig57083               | MNR | 246  | Riboviria sp.                                              | 90% | 44%  | 4e-13  |
| 373 | Contig57573               | MNR | 343  | Ceratobasidium endornavirus 2                              | 90% | 50%  | 3e-28  |
| 374 | Contig57952 <sup>a</sup>  | MNR | 263  | Lentinula edodes tymo-like virus 1                         | 84% | 47%  | 8e-13  |
| 375 | Contig59305               | MNR | 328  | Rhizoctonia solani endornavirus-RS006-2                    | 99% | 93%  | 5e-65  |
| 376 | Contig59316 <sup>a</sup>  | MNR | 566  | Rhizoctonia solani negative-stranded virus 1               | 92% | 43%  | 2e-36  |
| 377 | Contig59449               | MNR | 1259 | Rhizoctonia solani ourmia-like virus 5                     | 90% | 42%  | 4e-69  |
| 378 | Contig594991 <sup>a</sup> | MNR | 391  | Rhizoctonia solani negative-stranded virus 3               | 99% | 91%  | 2e-75  |
| 379 | Contig59633               | MNR | 501  | Rhizoctonia solani fusarivirus 4                           | 98% | 98%  | 3e-116 |
| 380 | Contig60033 <sup>a</sup>  | MNR | 937  | Rhizoctonia solani negative-stranded virus 3               | 81% | 47%  | 9e-64  |
| 381 | Contig60206               | MNR | 583  | Sclerotinia sclerotiorum ourmia-like virus 9               | 79% | 34%  | 2e-15  |
| 382 | Contig61133               | MNR | 742  | Ceratobasidium endornavirus C                              | 89% | 34%  | 1e-37  |
| 383 | Contig61770               | MNR | 814  | Binucleate Rhizoctonia hypovirus 1                         | 99% | 67%  | 2e-115 |
| 384 | Contig62097               | MNR | 583  | Binucleate Rhizoctonia hypovirus 1                         | 99% | 100% | 3e-129 |
| 385 | Contig63192               | MNR | 744  | Black grass cryptic virus 2                                | 99% | 45%  | 6e-58  |
| 386 | Contig63193               | MNR | 682  | uncultured Partitiviridae sp.                              | 88% | 44%  | 6e-53  |
| 387 | Contig63294               | MNR | 289  | Rhizoctonia solani fusarivirus 3                           | 99% | 47%  | 2e-18  |
| 388 | Contig63295               | MNR | 575  | Rhizoctonia solani fusarivirus 3                           | 99% | 69%  | 3e-70  |

|     |                          |     |      |                                                 |     |     |        |
|-----|--------------------------|-----|------|-------------------------------------------------|-----|-----|--------|
| 389 | Contig63368              | MNR | 536  | Rhizoctonia solani endornavirus-RS058-1         | 84% | 43% | 1e-34  |
| 390 | Contig1002               | MNR | 376  | Rhizoctonia solani mitovirus 106                | 98% | 61% | 6e-32  |
| 391 | Contig63710              | MNR | 1429 | Ceratobasidium endornavirus C                   | 81% | 39% | 4e-73  |
| 392 | Contig64177              | MNR | 662  | uncultured partitivirus                         | 28% | 47% | 2e-07  |
| 393 | Contig64768              | MNR | 354  | Sarcosphaera coronaria partitivirus             | 99% | 75% | 9e-53  |
| 394 | Contig67201              | MNR | 972  | Rosellinia necatrix partitivirus 7              | 92% | 52% | 6e-96  |
| 395 | Contig67587              | MNR | 380  | Armillaria mellea ourmia-like virus 1           | 86% | 42% | 5e-06  |
| 396 | Contig67619              | MNR | 358  | Nemesia ring necrosis virus                     | 89% | 36% | 3e-10  |
| 397 | Contig67802              | MNR | 1332 | Erysiphales narna-like virus 3                  | 82% | 34% | 6e-50  |
| 398 | Contig68232              | MNR | 940  | Rhizoctonia solani fusarivirus 3                | 99% | 53% | 4e-104 |
| 399 | Contig68353              | MNR | 494  | Rosellinia necatrix partitivirus 24             | 99% | 64% | 1e-67  |
| 400 | Contig69027              | MNR | 860  | Erysiphe necator associated ourmia-like virus 3 | 54% | 36% | 4e-16  |
| 401 | Contig69619 <sup>a</sup> | MNR | 410  | Bat tymo-like virus                             | 95% | 41% | 1e-20  |
| 402 | Contig70096              | MNR | 1771 | Rhizoctonia solani fusarivirus 3                | 91% | 56% | 1e-167 |
| 403 | Contig70107              | MNR | 534  | Sclerotium hydrophilum virus 1                  | 82% | 80% | 2e-72  |
| 404 | Contig70128              | MNR | 359  | Burdock mottle virus                            | 62% | 53% | 4e-12  |
| 405 | Contig72127              | MNR | 1385 | Morchella importuna endornavirus 1              | 95% | 49% | 6e-126 |
| 406 | Contig72133              | MNR | 420  | Burdock mottle virus                            | 81% | 46% | 2e-21  |
| 407 | Contig72364              | MNR | 362  | Rhizoctonia solani fusarivirus 3                | 99% | 60% | 4e-41  |
| 408 | Contig72925              | MNR | 427  | Sclerotium rolfsii beny-like virus 1            | 84% | 35% | 3e-10  |
| 409 | Contig72993              | MNR | 982  | Rhizoctonia solani fusarivirus 3                | 98% | 32% | 4e-29  |
| 410 | Contig73098              | MNR | 868  | Rhizoctonia solani bunya/phlebo-like virus 1    | 90% | 29% | 7e-16  |
| 411 | Contig73195              | MNR | 290  | Rhizoctonia solani endornavirus-RS024-1         | 99% | 99% | 3e-61  |
| 412 | Contig73448              | MNR | 886  | Rhizoctonia solani ourmia-like virus 5          | 92% | 49% | 1e-65  |
| 413 | Contig74745              | MNR | 413  | Rosellinia necatrix partitivirus 19             | 90% | 57% | 1e-39  |
| 414 | Contig74863              | MNR | 316  | Rhizoctonia solani endornavirus 6               | 98% | 88% | 1e-57  |



|     |                          |     |      |                                                       |      |      |        |
|-----|--------------------------|-----|------|-------------------------------------------------------|------|------|--------|
| 415 | Contig75133              | MNR | 250  | Rhizoctonia solani fusarivirus 4                      | 99%  | 98%  | 2e-46  |
| 416 | Contig75191              | MNR | 825  | Grapevine associated tymo-like virus                  | 88%  | 32%  | 6e-24  |
| 417 | Contig75269              | MNR | 466  | Rhizoctonia solani partitivirus virus 4               | 72%  | 65%  | 4e-49  |
| 418 | Contig75418              | MNR | 296  | Endornavirus-like virus                               | 97%  | 44%  | 5e-15  |
| 419 | Contig2480               | MNR | 369  | Rhizoctonia solani mitovirus 33                       | 99%  | 75%  | 2e-58  |
| 420 | Contig75710              | MNR | 578  | Apple ourmia-like virus 3                             | 99%  | 45%  | 9e-40  |
| 421 | Contig75863              | MNR | 582  | Ceratobasidium endornavirus B                         | 94%  | 28%  | 7e-08  |
| 422 | Contig76352              | MNR | 832  | Sclerotium hydrophilum virus 2                        | 92%  | 71%  | 2e-131 |
| 423 | Contig77123              | MNR | 410  | Rhizoctonia solani fusarivirus 3                      | 98%  | 77%  | 1e-65  |
| 424 | Contig77370              | MNR | 555  | Beet necrotic yellow vein virus                       | 73%  | 38%  | 2e-19  |
| 425 | Contig77486              | MNR | 369  | Rhizoctonia solani endornavirus 1                     | 96%  | 54%  | 7e-35  |
| 426 | Contig77550              | MNR | 271  | Maize chlorotic mottle virus                          | 98%  | 100% | 1e-56  |
| 427 | Contig77557              | MNR | 841  | Diuris pendunculata cryptic virus                     | 62%  | 31%  | 1e-17  |
| 428 | Contig78826              | MNR | 651  | Rhizoctonia solani fusarivirus 3                      | 100% | 81%  | 2e-106 |
| 429 | Contig79475 <sup>a</sup> | MNR | 221  | Rhizoctonia solani negative-stranded virus 1          | 99%  | 88%  | 3e-36  |
| 430 | Contig79687              | MNR | 299  | Passion fruit yellow mosaic virus                     | 97%  | 33%  | 8e-06  |
| 431 | Contig80150              | MNR | 333  | Rhizoctonia solani mitovirus 29                       | 97%  | 56%  | 7e-27  |
| 432 | First_Contig830          | MNR | 326  | Macrophomina phaseolina mitovirus 3                   | 98%  | 55%  | 7e-29  |
| 433 | Contig80280              | MNR | 702  | Rhizoctonia solani endornavirus 1                     | 99%  | 33%  | 4e-24  |
| 434 | Contig81423 <sup>a</sup> | MNR | 263  | Rhizoctonia solani negative-stranded virus 3          | 98%  | 58%  | 9e-25  |
| 435 | Contig81873              | MNR | 259  | Rhizoctonia solani partitivirus virus 4               | 97%  | 64%  | 6e-31  |
| 436 | Contig82133 <sup>a</sup> | MNR | 509  | Agaricus bisporus virus 12                            | 99%  | 29%  | 1e-06  |
| 437 | Contig82475              | MNR | 209  | Sanya totivirus 4                                     | 77%  | 46%  | 5e-09  |
| 438 | Contig82498              | MNR | 1089 | Diatom colony associated dsRNA virus 17 genome type A | 87%  | 34%  | 3e-44  |
| 439 | Contig83123              | MNR | 476  | Rhizoctonia solani fusarivirus 4                      | 99%  | 80%  | 3e-70  |
| 440 | Contig83592              | MNR | 1038 | Rhizoctonia solani fusarivirus 3                      | 99%  | 68%  | 4e-143 |

|     |                          |     |      |                                                       |     |      |        |
|-----|--------------------------|-----|------|-------------------------------------------------------|-----|------|--------|
| 441 | Contig83859              | MNR | 952  | Rhizoctonia solani fusarivirus 3                      | 99% | 67%  | 3e-130 |
| 442 | Contig84441              | MNR | 529  | Agaricus bisporus virus 11                            | 90% | 52%  | 3e-37  |
| 443 | Contig84828              | MNR | 648  | Grapevine-associated mymona-like virus 1              | 83% | 33%  | 2e-18  |
| 444 | Contig85382              | MNR | 366  | Sclerotium hydrophilum virus 1                        | 94% | 81%  | 4e-60  |
| 445 | Contig85594              | MNR | 731  | Rhizoctonia solani fusarivirus 3                      | 96% | 41%  | 2e-44  |
| 446 | Contig85804              | MNR | 656  | Rhizoctonia solani fusarivirus 4                      | 99% | 99%  | 3e-147 |
| 447 | Contig86139              | MNR | 305  | Alphaendornavirus sp.                                 | 92% | 55%  | 7e-30  |
| 448 | Contig86329              | MNR | 304  | Gaeumannomyces tritici partitivirus 1                 | 59% | 52%  | 8e-11  |
| 449 | Contig86830              | MNR | 403  | Rosellinia necatrix partitivirus 19                   | 99% | 76%  | 3e-63  |
| 450 | Contig87038              | MNR | 620  | Beihai razor shell virus 4                            | 96% | 31%  | 2e-14  |
| 451 | Contig87694              | MNR | 421  | Elderberry carlavirus B                               | 89% | 32%  | 3e-04  |
| 452 | Contig87744              | MNR | 430  | Sclerotium rolsii hypovirus 8                         | 99% | 58%  | 2e-37  |
| 453 | Contig88132              | MNR | 278  | Heterobasidion partitivirus 4                         | 82% | 67%  | 7e-27  |
| 454 | Contig88726              | MNR | 931  | Rhizoctonia solani fusarivirus 3                      | 99% | 85%  | 5e-173 |
| 455 | Contig88830 <sup>a</sup> | MNR | 1235 | Soybean leaf-associated negative-stranded RNA virus 4 | 98% | 32%  | 2e-58  |
| 456 | Contig88839              | MNR | 594  | Rhizoctonia solani fusarivirus 4                      | 99% | 97%  | 8e-127 |
| 457 | Contig89069 <sup>a</sup> | MNR | 279  | Magnaporthe oryzae mononegaambi virus 1               | 90% | 40%  | 2e-11  |
| 458 | Contig89150              | MNR | 354  | Rhizoctonia solani endornavirus-RS002                 | 51% | 59%  | 1e-12  |
| 459 | Contig90053              | MNR | 206  | Rhizoctonia solani fusarivirus 4                      | 99% | 97%  | 4e-37  |
| 460 | Contig90123              | MNR | 465  | Rhizoctonia solani endornavirus-RS058-1               | 72% | 53%  | 2e-34  |
| 461 | Contig90626              | MNR | 671  | Rhizoctonia solani negative-stranded virus 1          | 99% | 57%  | 2e-74  |
| 462 | Contig91173              | MNR | 665  | Rhizoctonia solani ourmia-like virus 5                | 99% | 49%  | 3e-54  |
| 463 | Contig91694              | MNR | 249  | Rhizoctonia solani fusarivirus 4                      | 97% | 100% | 3e-47  |
| 464 | Contig91788              | MNR | 514  | Trichoderma harzianum hypovirus 1                     | 95% | 27%  | 3e-08  |
| 465 | Contig91834              | MNR | 554  | Rhizoctonia solani endornavirus-RS002                 | 99% | 99%  | 1e-75  |
| 466 | Contig92293              | MNR | 293  | Rhizoctonia solani fusarivirus 3                      | 99% | 93%  | 1e-54  |

|     |                           |     |     |                                                      |     |     |        |
|-----|---------------------------|-----|-----|------------------------------------------------------|-----|-----|--------|
| 467 | Contig92338               | MNR | 681 | Rhizoctonia solani hypovirus 1                       | 98% | 68% | 8e-94  |
| 468 | Contig6498                | MNR | 303 | Rhizoctonia solani mitovirus 14                      | 96% | 47% | 2e-20  |
| 469 | Contig93348               | MNR | 300 | Sclerotinia sclerotiorum mycoalphavirus virus 1      | 94% | 37% | 3e-20  |
| 470 | Contig94125               | MNR | 337 | Rhizoctonia solani fusarivirus 3                     | 98% | 79% | 3e-56  |
| 471 | Contig94158               | MNR | 253 | Helicobasidium mompa dsRNA mycovirus                 | 80% | 68% | 7e-22  |
| 472 | Contig94210               | MNR | 627 | Rhizoctonia solani fusarivirus 2                     | 99% | 62% | 4e-87  |
| 473 | Contig94389               | MNR | 491 | Sclerotium rolfsii hypovirus 8                       | 89% | 51% | 7e-42  |
| 474 | Contig95180               | MNR | 377 | Rhizoctonia solani endornavirus 2                    | 99% | 44% | 2e-27  |
| 475 | Contig4724                | MNR | 297 | Rhizoctonia solani mitovirus 4                       | 90% | 69% | 3e-34  |
| 476 | Contig95612               | MNR | 394 | Rhizoctonia solani endornavirus-RS058-1              | 99% | 96% | 3e-88  |
| 477 | Contig118767              | MNR | 292 | Rhizoctonia solani mitovirus 28                      | 98% | 42% | 2e-08  |
| 478 | Contig96241               | MNR | 557 | Rhizoctonia solani endornavirus-RS098-1              | 99% | 97% | 6e-129 |
| 479 | Contig96851 <sup>a</sup>  | MNR | 940 | Rhizoctonia solani negative-stranded virus 1         | 90% | 76% | 1e-141 |
| 480 | Contig97781               | MNR | 219 | Fusarium solani partitivirus 2                       | 97% | 62% | 2e-23  |
| 481 | Contig97838               | MNR | 244 | Rhizoctonia solani endornavirus-RS058-1              | 98% | 94% | 3e-45  |
| 482 | Contig98258               | MNR | 412 | Rhizoctonia solani endornavirus 5                    | 99% | 54% | 5e-40  |
| 483 | Contig98390               | MNR | 934 | Rhizoctonia solani partitivirus 8                    | 88% | 60% | 2e-110 |
| 484 | Contig98883 <sup>a</sup>  | MNR | 261 | Sclerotinia sclerotiorum mycotymovirus 1             | 98% | 42% | 3e-11  |
| 485 | Contig98890               | MNR | 582 | Plasmopara associated mycobunyavirales-like virus 2  | 91% | 34% | 5e-15  |
| 486 | Contig100343              | MNR | 267 | Agaricus bisporus virus 13                           | 97% | 43% | 4e-10  |
| 487 | Contig100624 <sup>a</sup> | MNR | 349 | Rhizoctonia solani negative-stranded virus 2         | 95% | 83% | 5e-27  |
| 488 | Contig100862 <sup>a</sup> | MNR | 523 | Penicillium cairnsense negative-stranded RNA virus 1 | 96% | 29% | 2e-13  |
| 489 | Contig101162              | MNR | 259 | Rosellinia necatrix partitivirus 22                  | 99% | 79% | 2e-43  |
| 490 | Contig101165 <sup>a</sup> | MNR | 298 | Rhizoctonia solani negative-stranded virus 1         | 99% | 60% | 2e-31  |
| 491 | Contig101452              | MNR | 652 | Rhizoctonia solani fusarivirus 3                     | 99% | 87% | 8e-116 |
| 492 | Contig101748              | MNR | 626 | Ceratobasidium endornavirus C                        | 99% | 57% | 6e-76  |

|     |                           |     |     |                                                       |      |     |        |
|-----|---------------------------|-----|-----|-------------------------------------------------------|------|-----|--------|
| 493 | Contig103956              | MNR | 282 | Bipolaris maydis partitivirus 1                       | 97%  | 57% | 9e-25  |
| 494 | Contig104147              | MNR | 393 | Rosellinia necatrix partitivirus 7                    | 99%  | 89% | 3e-75  |
| 495 | Contig104192              | MNR | 369 | Lentinula edodes tymo-like virus 1                    | 100% | 44% | 2e-24  |
| 496 | Contig104202              | MNR | 448 | Rhizoctonia solani fusarivirus 2                      | 97%  | 36% | 2e-20  |
| 497 | Contig104383 <sup>a</sup> | MNR | 412 | Rhizoctonia solani negative-stranded virus 2          | 99%  | 63% | 4e-46  |
| 498 | Contig104432              | MNR | 836 | Rhizoctonia solani fusarivirus 2                      | 99%  | 61% | 8e-109 |
| 499 | Contig104487 <sup>a</sup> | MNR | 334 | Rhizoctonia solani negative-stranded virus 2          | 98%  | 65% | 2e-42  |
| 500 | Contig104495              | MNR | 319 | Cryphonectria hypovirus 1                             | 97%  | 42% | 2e-14  |
| 501 | Contig104697              | MNR | 509 | Rhizoctonia fumigata mycovirus                        | 99%  | 47% | 2e-34  |
| 502 | Contig104854              | MNR | 440 | Rhizoctonia solani fusarivirus 1                      | 86%  | 52% | 7e-33  |
| 503 | Contig104959              | MNR | 837 | Rosellinia necatrix partitivirus 7                    | 89%  | 76% | 2e-129 |
| 504 | Contig105365              | MNR | 554 | Sclerotium rolfsii hypovirus 8                        | 99%  | 44% | 8e-31  |
| 505 | Contig105698              | MNR | 300 | Rhizoctonia solani endornavirus 6                     | 99%  | 85% | 5e-39  |
| 506 | Contig105996 <sup>a</sup> | MNR | 335 | Rhizoctonia solani negative-stranded virus 3          | 99%  | 82% | 4e-58  |
| 507 | Contig106094              | MNR | 332 | Rosellinia necatrix hypovirus 1                       | 63%  | 38% | 2e-10  |
| 508 | Contig106149              | MNR | 573 | Rhizoctonia solani partitivirus 7                     | 95%  | 58% | 5e-63  |
| 509 | Contig106356              | MNR | 283 | Rhizoctonia solani endornavirus-RS002                 | 99%  | 96% | 8e-53  |
| 510 | Contig106552              | MNR | 424 | Rhizoctonia solani fusarivirus 3                      | 99%  | 48% | 7e-37  |
| 511 | Contig106837              | MNR | 446 | Rhizoctonia solani alphavirus-like 4                  | 95%  | 64% | 8e-55  |
| 512 | Contig106918              | MNR | 402 | Rhizoctonia solani fusarivirus 3                      | 98%  | 55% | 7e-41  |
| 513 | Contig107085              | MNR | 303 | Rosellinia necatrix partitivirus 2                    | 97%  | 40% | 5e-12  |
| 514 | Contig107789              | MNR | 387 | Sclerotium rolfsii hypovirus 8                        | 92%  | 51% | 8e-19  |
| 515 | Contig107812 <sup>a</sup> | MNR | 351 | Soybean leaf-associated negative-stranded RNA virus 4 | 98%  | 29% | 2e-08  |
| 516 | Contig107956 <sup>a</sup> | MNR | 377 | Rhizoctonia solani negative-stranded virus 2          | 81%  | 45% | 3e-16  |
| 517 | Contig108297              | MNR | 739 | Rhizoctonia solani fusarivirus 3                      | 56%  | 39% | 3e-34  |
| 518 | Contig108745              | MNR | 255 | Rhizoctonia solani partitivirus 1                     | 97%  | 45% | 2e-1   |

|     |                           |     |     |                                                       |      |     |       |
|-----|---------------------------|-----|-----|-------------------------------------------------------|------|-----|-------|
| 519 | Contig108777 <sup>a</sup> | MNR | 412 | Rhizoctonia solani negative-stranded virus 1          | 99%  | 62% | 2e-39 |
| 520 | Contig109012              | MNR | 363 | Heterobasidion partitivirus 15                        | 100% | 54% | 3e-31 |
| 521 | Contig109045              | MNR | 380 | Heterobasidion partitivirus 4                         | 92%  | 57% | 3e-38 |
| 522 | Contig109562              | MNR | 355 | Fusarium solani partitivirus 2                        | 55%  | 47% | 2e-13 |
| 523 | Contig109737 <sup>a</sup> | MNR | 302 | Soybean leaf-associated negative-stranded RNA virus 4 | 99%  | 37% | 3e-09 |
| 524 | Contig109804              | MNR | 384 | Plasmopara viticola associated Partitivirus 9         | 96%  | 59% | 7e-37 |
| 525 | Contig109942              | MNR | 268 | Rhizoctonia fumigata mycovirus                        | 96%  | 54% | 1e-22 |
| 526 | Contig110495              | MNR | 663 | Agaricus bisporus virus 13                            | 93%  | 49% | 2e-58 |
| 527 | Contig110648              | MNR | 493 | Agaricus bisporus virus 13                            | 93%  | 50% | 6e-36 |
| 528 | Contig110721              | MNR | 236 | Endornavirus-like virus                               | 82%  | 40% | 1e-09 |
| 529 | Contig111317              | MNR | 534 | Rhizoctonia solani fusarivirus 3                      | 96%  | 78% | 8e-83 |
| 530 | Contig111570 <sup>a</sup> | MNR | 406 | Rhizoctonia solani negative-stranded virus 2          | 98%  | 57% | 2e-41 |
| 531 | Contig112116 <sup>a</sup> | MNR | 243 | Rhizoctonia solani negative-stranded virus 3          | 98%  | 84% | 8e-39 |
| 532 | Contig112215 <sup>a</sup> | MNR | 276 | Rhizoctonia solani negative-stranded virus 2          | 95%  | 63% | 4e-28 |
| 533 | Contig112455              | MNR | 329 | Rhizoctonia solani fusarivirus 2                      | 94%  | 38% | 9e-16 |
| 534 | Contig113163              | MNR | 267 | Lentinula edodes deltaflexivirus 2                    | 98%  | 65% | 3e-15 |
| 535 | Contig113323              | MNR | 259 | Rhizoctonia solani mycovirus 2                        | 99%  | 65% | 6e-32 |
| 536 | Contig113765              | MNR | 254 | Ceratobasidium endornavirus C                         | 99%  | 63% | 1e-28 |
| 537 | Contig113919              | MNR | 454 | Ceratobasidium endornavirus C                         | 99%  | 37% | 3e-19 |
| 538 | Contig114427              | MNR | 341 | Rhizoctonia solani mycovirus 2                        | 99%  | 65% | 2e-48 |
| 539 | Contig114705              | MNR | 319 | Rhizoctonia solani RNA virus 1                        | 98%  | 82% | 6e-38 |
| 540 | Contig115831              | MNR | 345 | Neofusicoccum luteum fusarivirus 1                    | 95%  | 45% | 2e-23 |
| 541 | Contig116509              | MNR | 331 | Sanya totivirus 2                                     | 95%  | 52% | 4e-20 |
| 542 | Contig116782              | MNR | 214 | Ceratobasidium virus B                                | 77%  | 60% | 1e-13 |
| 543 | Contig116811              | MNR | 244 | Rhizoctonia solani endornavirus-PR-2                  | 99%  | 49% | 2e-16 |
| 544 | Contig116950              | MNR | 305 | Beihai sesamid crab virus 7                           | 91%  | 46% | 5e-15 |

|     |              |     |     |                                         |      |      |        |
|-----|--------------|-----|-----|-----------------------------------------|------|------|--------|
| 545 | Contig117655 | MNR | 468 | Ceratobasidium endornavirus C           | 98%  | 38%  | 5e-31  |
| 546 | Contig117759 | MNR | 252 | Rhizoctonia solani endornavirus-PR-2    | 73%  | 58%  | 3e-14  |
| 547 | Contig95982  | MNR | 255 | Rhizoctonia solani mitovirus 7          | 98%  | 77%  | 2e-35  |
| 548 | Contig118773 | MNR | 541 | Rhizoctonia solani endornavirus-RS002   | 99%  | 99%  | 9e-120 |
| 549 | Contig119100 | MNR | 288 | Rhizoctonia solani fusarivirus 3        | 97%  | 79%  | 3e-44  |
| 550 | Contig119204 | MNR | 309 | Rhizoctonia solani beny-like virus 1    | 98%  | 62%  | 1e-31  |
| 551 | Contig119314 | MNR | 308 | Grapevine Red Globe virus               | 97%  | 43%  | 1e-14  |
| 552 | Contig119411 | MNR | 511 | Rosellinia necatrix partitivirus 7      | 98%  | 52%  | 2e-52  |
| 553 | Contig119458 | MNR | 480 | Fusarium poae fusarivirus 1             | 95%  | 34%  | 3e-20  |
| 554 | Contig119833 | MNR | 336 | Rhizoctonia solani fusarivirus 2        | 98%  | 72%  | 2e-50  |
| 555 | Contig119893 | MNR | 328 | Rosellinia necatrix fusarivirus 1       | 69%  | 45%  | 6e-13  |
| 556 | Contig120001 | MNR | 216 | Vicia faba partitivirus 1               | 77%  | 59%  | 1e-10  |
| 557 | Contig120070 | MNR | 266 | Grapevine fleck virus                   | 89%  | 45%  | 1e-09  |
| 558 | Contig120076 | MNR | 606 | Rhizoctonia solani virus-RS002          | 94%  | 44%  | 1e-43  |
| 559 | Contig120227 | MNR | 479 | Endornavirus-like virus                 | 61%  | 47%  | 8e-08  |
| 560 | Contig120356 | MNR | 216 | Rhizoctonia solani endornavirus-RS002   | 97%  | 100% | 5e-29  |
| 561 | Contig120390 | MNR | 378 | Callinectes sapidus toti-like virus 1   | 92%  | 45%  | 5e-26  |
| 562 | Contig75492  | MNR | 247 | Rhizoctonia solani mitovirus 16         | 98%  | 67%  | 5e-29  |
| 563 | Contig120709 | MNR | 245 | Rhizoctonia solani dsRNA virus 1        | 97%  | 57%  | 3e-22  |
| 564 | Contig121363 | MNR | 283 | Rhizoctonia solani endornavirus-RS006-2 | 98%  | 55%  | 3e-28  |
| 565 | Contig121523 | MNR | 429 | Ceratobasidium hypovirus A              | 80%  | 49%  | 2e-26  |
| 566 | Contig121532 | MNR | 342 | Rhizoctonia solani fusarivirus 3        | 100% | 88%  | 5e-64  |
| 567 | Contig122456 | MNR | 271 | Piper methysticum tymovirus 1           | 79%  | 54%  | 2e-12  |
| 568 | Contig122757 | MNR | 517 | Rhizoctonia solani hypovirus 1          | 99%  | 34%  | 6e-22  |
| 569 | Contig122870 | MNR | 376 | Rhizoctonia solani endornavirus-RS002   | 94%  | 42%  | 2e-23  |
| 570 | Contig122901 | MNR | 422 | Rhizoctonia solani endornavirus 5       | 98%  | 54%  | 1e-42  |

|     |                           |     |     |                                              |      |      |       |
|-----|---------------------------|-----|-----|----------------------------------------------|------|------|-------|
| 571 | Contig123125              | MNR | 268 | Rose partitivirus                            | 98%  | 64%  | 9e-29 |
| 572 | Contig123349              | MNR | 574 | Beihai razor shell virus 4                   | 58%  | 33%  | 7e-07 |
| 573 | Contig123716              | MNR | 360 | Rhizoctonia solani endornavirus-RS006-2      | 95%  | 44%  | 2e-23 |
| 574 | Contig123752              | MNR | 368 | Ceratobasidium endornavirus C                | 99%  | 64%  | 1e-43 |
| 575 | Contig124447 <sup>a</sup> | MNR | 401 | Rhizoctonia solani negative-stranded virus 1 | 98%  | 62%  | 3e-51 |
| 576 | Contig124506              | MNR | 227 | Rhizoctonia solani fusarivirus 3             | 98%  | 82%  | 6e-16 |
| 577 | Contig124553              | MNR | 255 | Rhizoctonia solani fusarivirus 2             | 98%  | 62%  | 1e-28 |
| 578 | Contig125132              | MNR | 357 | Ceratobasidium mycovirus-like                | 96%  | 50%  | 3e-26 |
| 579 | Contig125714              | MNR | 226 | Rhizoctonia solani fusarivirus 3             | 98%  | 89%  | 2e-39 |
| 580 | Contig126004              | MNR | 255 | Rhizoctonia solani endornavirus 1            | 100% | 58%  | 6e-28 |
| 581 | Contig63584               | MNR | 220 | Rhizoctonia solani mitovirus 22              | 99%  | 68%  | 7e-25 |
| 582 | Contig126523              | MNR | 506 | Rhizoctonia solani alphaendornavirus 1       | 97%  | 45%  | 6e-38 |
| 583 | Contig126748              | MNR | 220 | Entomophthora benyvirus E                    | 95%  | 45%  | 7e-12 |
| 584 | Contig126894              | MNR | 303 | Sinomenium acutum tymovirus 1                | 99%  | 47%  | 2e-24 |
| 585 | Contig126965              | MNR | 236 | Rhizoctonia solani alphaendornavirus 1       | 97%  | 51%  | 2e-17 |
| 586 | Contig127528              | MNR | 342 | Rosellinia necatrix fusarivirus 1            | 100% | 60%  | 4e-34 |
| 587 | Contig127771 <sup>a</sup> | MNR | 266 | Rhizoctonia solani negative-stranded virus 7 | 99%  | 100% | 8e-52 |
| 588 | Contig129154              | MNR | 277 | Rhizoctonia solani endornavirus-RS024-1      | 98%  | 93%  | 1e-50 |
| 589 | Contig129402              | MNR | 215 | Rhizoctonia solani endornavirus 6            | 89%  | 84%  | 3e-13 |
| 590 | Contig129690              | MNR | 209 | Rhizoctonia solani endornavirus-RS058-1      | 84%  | 56%  | 5e-13 |
| 591 | Contig126417              | MNR | 207 | Binucleate Rhizoctonia mitovirus K1          | 98%  | 85%  | 6e-34 |
| 592 | Contig130373              | MNR | 218 | Medicago sativa alphapartitivirus 1          | 99%  | 68%  | 7e-25 |
| 593 | Contig130919              | MNR | 261 | Sinomenium acutum tymovirus 1                | 98%  | 47%  | 4e-14 |

**Note:** <sup>a</sup> indicated the unclassified putative mycoviruses found in BNR or MNR in this study using metatranscriptome sequencing.
